# Supplementary material
Source: publisher figshare collection journal article supplement (https://sage.figshare.com/ndownloader/files/11655488)
Supplement: Supplementary file 1 [file 11655488]

## ANNEXE 1: LIST OF THE ARTICLES USED IN THE META-ANALYSIS

- Agerberg, Mattias (2017). Failed expectations: Quality of government and support for populist parties in Europe. *European Journal of Political Research*, 56(3): 578–600.
- Anderson, Christopher J. (1996). Economics, Politics, and Foreigners: Populist Party Support in Denmark and Norway. *Electoral Studies*, 15(4): 497–511.
- Arzheimer, Kai and Elisabeth Carter (2009). How (Not) to Operationalise Subnational Political Opportunity Structures: A Critique of Kestilä and Söderlund's Study of Regional Elections. *European Journal of Political Research*, 48(3): 335–358.
- Auberger, Antoine (2008). The National Front Vote and Turnout in the French Presidential Elections. *French Politics*, 6(1): 94–100.
- Baimbridge, Mark, Brian Burkitt, and Maria Macey (1994). The Maastricht Treaty: Exacerbating Racism in Europe? *Ethnic and Racial Studies*, 17(3): 420–441.
- Bjørklund, Tor (2007). Unemployment and the Radical Right in Scandinavia: Beneficial or Non-Beneficial for Electoral Support? *Comparative European Politics*, 5(3): 245–263.
- Boomgaarden, Hajo G. and Rens Vliegenthart (2007). Explaining the Rise of Anti-Immigrant Parties: The Role of News Media Content. *Electoral Studies*, 26 (2): 404–417.
- Borisjuk, Galina, Colin Rallings, Michael Thrasher and Henk van der Kolk (2007). Voter Support for Minor Parties, Assessing the Social and Political Context of Voting at the 2004 European Elections in Greater London. *Party Politics*, 13(6):669–693.
- Bowyer, Benjamin (2008). Local context and extreme right support in England: The British National Party in the 2002 and 2003 local elections. *Electoral Studies*, 27 (4): 611–620.
- Chapin, Wesley (1997). Explaining the Electoral Success of the New Right. The German Case. *West European Politics*, 20 (2): 53–72.
- Clarkea, Harold, Paul Whiteleyb, Walter Borgesc, David Sandersb and Marianne Stewart (2016). Modelling the dynamics of support for a right-wing populist party: the case of UKIP, *Journal of Public Opinion and Parties*, 26 (2): 135–154.
- Coffé, Hilde, Bruno Heyndels, and Jan Vermeir (2007). Fertile grounds for extreme right-wing parties: Explaining the Vlaams Blok's electoral success. *Electoral Studies*, 26 (1): 142–155.
- Dahlström, Carl and Anders Sundell (2012). A losing gamble. How mainstream parties facilitate anti-immigrant party success, *Electoral Studies*, 31: 353–363.
- Dinas, Elias and Joost van Spanje (2011). Crime Story: The role of crime and immigration in the anti-immigration vote. *Electoral Studies*, 30 (4): 658–671.
- Dupoiriera, Elisabeth and Nicolas Sauger (2010). Four Rounds in a Row: The impact of Presidential Election Outcomes on Legislative Elections in France, *French Politics*, 8(1): 21–4.
- Evans, Jocelyn and Gilles Ivaldi (2008). Forecasting the Extreme Right Vote in France (1984–2007), *French Politics*, 6(1): 137–151.
- Evans, Jocelyn and Gilles Ivaldi (2012). Forecasting the FN presidential vote in 2012, *French Politics*, 10(1): 44–67.

- Faas, Thorsten and Andreas M. Wüst (2002). The Schill Factor in the Hamburg State Election 2001, *German Politics*, 11(2): 1–20.
- Fauvelle-Aymar, Christine and Michael S. Lewis-Beck (2005), Coalition Strategies and the National Front Vote in French Legislative Contests, *French Politics*, 3(2): 164–177.
- Fitzgerald, Jennifer and Duncan Lawrence (2011). Local cohesion and radical right support: The case of the Swiss People's Party. *Electoral Studies*, 30 (4): 834-847.
- Golder, Matt (2003). Electoral Institutions, Unemployment and Extreme Right Parties. A Correction. *British Journal of Political Science*, 33(3): 525-534.
- Golder, Matt (2003). Explaining Variation in the Success of Extreme Right Parties in Western Europe. *Comparative Political Studies*, 36(3): 432-466.
- Jackman, Robert W. and Karin Volpert (1996). Conditions Favouring Parties of the Extreme Right in Western Europe. *British Journal of Political Science*, 26(4): 501-521.
- Jeromea, Bruno and Véronique Jerome-Speziari (2012), Forecasting the 2012 French Presidential Election: Comparing Vote Function Simulations and Vote Intention Polls, *French Politics*, 10: 22–43.
- Jesuit, David K., Piotr R. Paradowski, and Vincent a. Mahler (2009). Electoral support for extreme right-wing parties: A sub-national analysis of western European elections. *Electoral Studies*, 28 (2): 279-290.
- Jørgen Sørensen, Rune (2016). After the Immigration Shock: The Causal Effect of Immigration on Electoral Preferences, *Electoral Studies*, 44(1): 1-14.
- Kaufmann, Eric (2017). Levels or changes?: Ethnic Context, Immigration and the UK Independence Party Vote, *Electoral Studies*, 48(1): 57-69.
- Kestilä, Elina and Peter Söderlund (2007). Local Determinants of Radical Right-Wing Voting: The case of the Norwegian Progress Party. *West European Politics*, 30(3): 549-572.
- Kestilä, Elina and Peter Söderlund (2007). Subnational Political Opportunity Structures and the Success of the Radical Right. Evidence from the March 2004 Regional Elections in France. *European Journal of Political Research*, 46(6): 773-796.
- Knigge, Pia (1998). The Ecological Correlates of Right-Wing Extremism in Western Europe. *European Journal of Political Research*, 34(2): 249-279.
- Koopmans, Ruud and Jasper Muis (2009). The rise of right-wing populist Pim Fortuyn in the Netherlands. A discursive opportunity approach. *European Journal of Political Research*, 48(5): 642-664.
- Loxbo, Karl and Niklas Bolin (2016). Party Organizational Development and the Electoral Performance of the Radical Right: Exploring the Role of Local Candidates in the Breakthrough Elections of the Sweden Democrats 2002–2014, *Journal of Elections, Public Opinion and Parties*, 26(2): 170-190.
- Loxbo, Karl (2010). The Impact of the Radical Right: Lessons from the Local Level in Sweden, 2002–2006, *Scandinavian Political Studies*, 33 (3): 295-315.

Pardos-Prado, Sergi (2015). How Can Mainstream Parties Prevent Niche Party Success? Center-Right Parties and the Immigration Issue, *The Journal of Politics*, 77(2): 352-367.

Poznyak, Dmitriy, Koen Abts, and Marc Swyngedouw (2011). The dynamics of the extreme right support: A growth curve model of the populist vote in Flanders-Belgium in 1987-2007. *Electoral Studies*, 30 (4): 672-688.

Rydgren, Jens and Patrick Ruth (2013). Contextual Explanations of Radical Right-Wing Support in Sweden: Socioeconomic Marginalization, Group Threat, and the Halo Effect. *Ethnic and Racial Studies*, 36 (4):711-728.

Rydgren, Jens and Patrick Ruth (2011). Voting for the Radical Right in Swedish Municipalities: Social Marginality and Ethnic Competition?, *Scandinavian Political Studies*, 34 (3): 202-225.

Sjoerdje Charlotte van Heerden, and Wouter van der Brug (2017). Demonisation and electoral support for populist radical right parties: A temporary effect, *Electoral Studies*, 47(1): 36-45.

Smith, Jason Matthew (2010). “Does Crime Pay? Issue Ownership, Political Opportunity, and the Populist Right in Western Europe.” *Comparative Political Studies* 43 (11): 1471-1498.

Spies, Dennis and Simon T. Franzmann (2011). A Two-Dimensional Approach to the Political Opportunity Structure of Extreme Right Parties in Western Europe. *West European Politics*, 34 (5): 1044-1069.

Stockemer Daniel (2017). The Rising Tide: Local Structural Determinants of the Radical Right-Wing Vote in Switzerland, *Comparative European Politics*, 1-18. (Advanced online publication)

Swank, Duane and Hans-Georg Betz (2003). Globalization, the Welfare State and Right-Wing Populism in Western Europe. *Socio-Economic Review*, 1(2): 215-245.

Van der Brug, Wouter, Meindert Fennema, and Jean Tillie (2005). “Why Some Anti-Immigrant Parties Fail and Others Succeed. A Two-Step Model of Aggregate Electoral Support.” *Comparative Political Studies*, 38: 537-573.

Van der Pas, Daphne, Catherine de Vries, and Wouter van der Brug (2013). A leader without a party: Exploring the relationship between Geert Wilders’ leadership performance in the media and his electoral success, *Party Politics*, 19(3) 458–476.

Vliegenthart, Rens, Hajo G. Boomgaarden & Joost Van Spanje (2012) Anti-Immigrant Party Support and Media Visibility: A Cross-Party, Over-Time Perspective, *Journal of Elections, Public Opinion and Parties*, 22(3): 315-358.

Walgrave, Stefaan and Knut Swert (2004). The Making of the (Issues of the) Vlaams Blok. *Political Communication*, 21(3): 479-500.

Westinen, Jussi (2014), True Finns: A Shock for Stability? Testing the Persistence of Electoral Geography in Volatile Elections, *Scandinavian Political Studies*, 37(2): 123-148.

Whitaker, Richard, and Philip Lynch (2011). Explaining Support for the UK Independence Party at the 2009 European Parliament Elections, *Journal of Elections, Public Opinion and Parties*, 21(3): 359-379.

## ANNEXE 2: COMPLETE LIST OF MODELS USED IN THE META-ANALYSIS

| Articles | Models                                                                                                                                                                                                                                                                                                                                                                                                                                                                                                                                                                                        |
|----------|-----------------------------------------------------------------------------------------------------------------------------------------------------------------------------------------------------------------------------------------------------------------------------------------------------------------------------------------------------------------------------------------------------------------------------------------------------------------------------------------------------------------------------------------------------------------------------------------------|
| 1        | The total share of the voters in a given NUTS region that voted for a populist party in the national parliamentary election = <b>EQI SCORE -8.368* (2.953)</b>                                                                                                                                                                                                                                                                                                                                                                                                                                |
| 1        | The total share of the voters in a given NUTS region that voted for a populist party in the national parliamentary election = <b>EQI SCORE -7.491*** (1.302)</b> with country-fixed effect                                                                                                                                                                                                                                                                                                                                                                                                    |
| 1        | The total share of the voters in a given NUTS region that voted for a populist party in the national parliamentary election = <b>EQI SCORE -6.794*** (1.314)</b> + GDP growth -0.207 (0.228) + Unemployment -0.277 (0.392) + Population density 0.246 (0.632) + Log of regional GDP per capita -11.654* (4.863) + Education 0.323 (0.237) + Non-native speakers -6.283 (8.719) + Ideology 6.489 (7.734) with country-fixed effect                                                                                                                                                             |
| 1        | The total share of the voters in a given NUTS region that voted for a populist party in the national parliamentary election = <b>EQI SCORE -5.594*** (1.268)</b> + GDP growth -0.212 (0.331) + Unemployment -0.112 (0.313) + Population density 0.687 (0.662) + Log of regional GDP per capita -7.878 (3.854) + Education 0.319 (0.199) + Non-native speakers -10.083 (17.885) + Ideology 7.878 (7.928) + Nativism 2.321* (0.808) with country-fixed effect                                                                                                                                   |
| 1        | The total share of the voters in a given NUTS region that voted for a populist party in the national parliamentary election = <b>EQI SCORE -7.584** (2.629)</b> + GDP growth -0.248 (0.238) + Unemployment -0.229 (0.261) + Population density 0.215 (0.662) + Log of regional GDP per capita -9.940** (3.015) + Education 0.240 (0.128) + Non-native speakers -8.299 (13.069) + Ideology 6.684 (6.445) + Log of regional GDP per capita 25.250 (30.574) + WGI -5.494 (6.831) + Effective number of parties -1.419 (2.024) + Western Europe -0.547 (14.222)                                   |
| 1        | The total share of the voters in a given NUTS region that voted for a populist party in the national parliamentary election = <b>EQI SCORE -5.087* (2.578)</b> + GDP growth -0.187 (0.233) + Unemployment -0.070 (0.270) + Population density 0.493 (0.644) + Log of regional GDP per capita -6.893* (3.188) + Education 0.251* (0.117) + Non-native speakers -4.643 (13.104) + Ideology 5.329 (5.906) + Nativism 1.777*** (0.450) (0.808) + Log of regional GDP per capita 23.528 (26.648) + WGI -10.430 (5.818) + Effective number of parties 0.240 (1.739) + Western Europe 9.182 (12.791) |
| 1        | The total share of the voters in a given NUTS region that voted for a populist party in the national parliamentary election = <b>EQI score -6.540*** (1.223)</b>                                                                                                                                                                                                                                                                                                                                                                                                                              |
| 1        | The total share of the voters in a given NUTS region that voted for a populist party in the national parliamentary election = <b>EQI score -5.265*** (1.067)</b>                                                                                                                                                                                                                                                                                                                                                                                                                              |
| 1        | The total share of the voters in a given NUTS region that voted for a populist party in the national parliamentary election = <b>EQI -5.138*** (1.018)</b>                                                                                                                                                                                                                                                                                                                                                                                                                                    |
| 1        | The total share of the voters in a given NUTS region that voted for a populist party in the national parliamentary election = <b>EQI score -4.471* (1.984)</b>                                                                                                                                                                                                                                                                                                                                                                                                                                |
| 2        | Public support for the Danish Progress Party = Support (t-1) 0.87** + Var. Unemployment rate 4.69** + Inflation 0.05                                                                                                                                                                                                                                                                                                                                                                                                                                                                          |
| 2        | Public support for the Danish Progress Party = Support (t-1) 0.91** + National election 0.58** + Referendum (-0.39) + Glistrup court event (-0.23) + Glistrup expulsion 0.33 + Left government 0.65                                                                                                                                                                                                                                                                                                                                                                                           |

|   |                                                                                                                                                                                                                                                                                                                                                                                                                                                               |
|---|---------------------------------------------------------------------------------------------------------------------------------------------------------------------------------------------------------------------------------------------------------------------------------------------------------------------------------------------------------------------------------------------------------------------------------------------------------------|
| 2 | Public support for the Danish Progress Party = $\text{Support (t-1)}0.85^{**} + \text{Foreign population}0.03^{*} + \text{National election}0.51^{**} + \text{Referendum (-0.55)} + \text{Glistrup court event (-0.10)} + \text{Glistrup expulsion (-0.38)} + \text{Left government } 0.97^{*}$                                                                                                                                                               |
| 2 | Public support for the Danish Progress Party = $\text{Support (t-1)}0.91^{**} + \text{Government Trend (-0.01)} + \text{Backswing (-0.09)} + \text{Post-election (0.09)}$                                                                                                                                                                                                                                                                                     |
| 2 | Public support for the Danish Progress Party = $\text{Support (t-1)} 0.81^{**} + \text{Var. Unemployment rate } 3.67^{*} + \text{Inflation } 0.02 + \text{Foreign population } 0.03 + \text{National election } 0.44^{**} + \text{Referendum (-0.36)} + \text{Glistrup court event (-0.01)} + \text{Glistrup expulsion } 0.01 + \text{Left government } 0.85$                                                                                                 |
| 2 | Public support for the Danish Progress Party = $\text{Support (t-1)} 0.78^{**} + \text{Var. Unemployment rate } 3.49^{*} + \text{Inflation (-0.04)} + \text{Foreign population } 0.03^{*} + \text{National election } 0.39^{*} + \text{Referendum (-0.39)} + \text{Glistrup court event } 0.08 + \text{Glistrup expulsion } -0.33 + \text{Left government } 1.09^{*} + \text{Government Trend (-0.03)} + \text{Backswing } 0.09 + \text{Post-election } 0.03$ |
| 2 | Public support for the Norwegian Progress Party = $\text{Support (t-1)}0.90^{**} + \text{Var. Unemployment rate}(-0.02) + \text{Inflation (-0.04)}$                                                                                                                                                                                                                                                                                                           |
| 2 | Public support for the Norwegian Progress Party = $\text{Support (t-1)}0.91^{**} + \text{National election (-0.08)} + \text{Left government } 0.32$                                                                                                                                                                                                                                                                                                           |
| 2 | Public support for the Norwegian Progress Party = $\text{Support (t-1)}0.80^{**} + \text{Foreign population } 0.03^{**} + \text{National election (-0.08)} + \text{Left government } 0.17$                                                                                                                                                                                                                                                                    |
| 2 | Public support for the Norwegian Progress Party = $\text{Support (t-1)}0.91^{**} + \text{Government Trend } 0.00 + \text{Backswing } 0.01 + \text{Post-election (-0.03)}$                                                                                                                                                                                                                                                                                     |
| 2 | Public support for the Norwegian Progress Party = $\text{Support (t-1)} 0.80^{**} + \text{Var. Unemployment rate (-0.34)} + \text{Inflation } 0.05 + \text{Foreign population } 0.03^{**} + \text{National election } -0.09 + \text{Left government } 0.15$                                                                                                                                                                                                   |
| 2 | Public support for the Norwegian Progress Party = $\text{Support (t-1)} 0.80^{**} + \text{Var. Unemployment rate (-0.32)} + \text{Inflation } 0.06 + \text{Foreign population } 0.03^{**} + \text{National election (-0.14)} + \text{Left government } 0.12 + \text{Government Trend } 0.04 + \text{Backswing } 0.19 + \text{Post-election } 0.03$                                                                                                            |
| 3 | Kestilä & Söderlund's model + Le Pen vote ( added by the article) = $\text{District magnitude } 1998 (\ln) -0.352 (0.475) + \text{Effective number of lists } 1998 -0.058 (0.256) + \text{Turnout } 2004 (\%) -0.107 (0.075) + \text{Immigrants born outside EU } (\%) -0.079 (0.062) + \text{Unemployment } (\%) 0.432^{*} (0.185) + \text{Vote for Le Pen } 2002 0.979^{***} (0.061)$                                                                       |
| 3 | Kestilä & Söderlund's model + Le Pen vote in 2002 ( added by the article) = $\text{Vote for Le Pen } 2002 1.042^{***} (0.045)$                                                                                                                                                                                                                                                                                                                                |
| 3 | Effective number of party lists + Le Pen vote model : FN support in the French 2004 regional election = $\text{Effective number of lists (1998)} -0.037 (0.249) + \text{Vote for Le Pen (2002)} 1.044^{***} (0.047)$ Adjusted R2= 0.850                                                                                                                                                                                                                       |
| 3 | Effective number of party lists model : FN support in the French 2004 regional election = $\text{Effective number of lists (1998)} 1.402^{*} (0.607)$ =====Adjusted R2= 0.044                                                                                                                                                                                                                                                                                 |
| 3 | Ideological competition model : FN support in the French 2004 regional election = $\text{MNR running } 3.181^{**} (1.076) + \text{Moderate right lists: 2) } -6.411^{***} (1.423) + \text{Moderate right lists: 3+) } -3.206 (1.434)$ Adjusted R2= 0.879                                                                                                                                                                                                      |
| 3 | Ideological Competition + Le Pen vote model: FN support in the French 2004 regional election = $(\text{Vote for Le Pen } 2002) 1.125^{***} (0.050) + \text{MNR running } -2.167^{***} (0.483) + \text{Moderate right lists: 2) } -0.255 (0.620) + \text{Moderate right lists: 3+) } -1.112 (0.567)$ Adjusted R2= 0.879                                                                                                                                        |
| 4 | Estimates of vote (FN) (1988-2002) = $\text{UNEMit } 0.03^{*} + \text{TURNit } -0.29^{***}$                                                                                                                                                                                                                                                                                                                                                                   |
| 4 | Estimates of vote (FN) (1988-2007) = $\text{UNEMit } 0.08^{***} + \text{TURNit } -0.32^{***}$                                                                                                                                                                                                                                                                                                                                                                 |

|   |                                                                                                                                                                                                                                                                                                                                                                                                                                                                                                                                                                                                                                                                                                                                                                       |
|---|-----------------------------------------------------------------------------------------------------------------------------------------------------------------------------------------------------------------------------------------------------------------------------------------------------------------------------------------------------------------------------------------------------------------------------------------------------------------------------------------------------------------------------------------------------------------------------------------------------------------------------------------------------------------------------------------------------------------------------------------------------------------------|
| 5 | Share of vote (%) 1984 = $1.904 + 0.021 \text{Unemployment in 1984} - 0.019 \text{Unemployment in 1983}$ ===== $R^2 = 0.93$                                                                                                                                                                                                                                                                                                                                                                                                                                                                                                                                                                                                                                           |
| 6 | Support for the Norwegian Progress Party 1987 = $\text{The share of non-western immigrants (4.10*)} + \text{Unemployment rate } (-0.51*)$ ===== $R^2 = 28\%$                                                                                                                                                                                                                                                                                                                                                                                                                                                                                                                                                                                                          |
| 6 | Support for the Norwegian Progress Party 1995 = $\text{The share of non-western immigrants (1.31*)} + \text{Unemployment rate } (-0.04)$ ===== $R^2 = 14\%$                                                                                                                                                                                                                                                                                                                                                                                                                                                                                                                                                                                                           |
| 6 | Support for the Norwegian Progress Party 1997 = $\text{The share of non-western immigrants (1.18*)} + \text{Unemployment rate } (-0.06)$ ===== $R^2 = 11\%$                                                                                                                                                                                                                                                                                                                                                                                                                                                                                                                                                                                                           |
| 6 | Support for the Norwegian Progress Party 2003 = $\text{The share of non-western immigrants (1.00*)} + \text{Unemployment rate (0.00)}$ ===== $R^2 = 6\%$                                                                                                                                                                                                                                                                                                                                                                                                                                                                                                                                                                                                              |
| 6 | Support for the Norwegian Progress Party 2005 = $\text{The share of non-western immigrants (0.83*)} + \text{Unemployment rate (0.02)}$ ===== $R^2 = 5\%$                                                                                                                                                                                                                                                                                                                                                                                                                                                                                                                                                                                                              |
| 7 | Anti-immigrant populist party support (1990 to 2002) = $\text{Moving average (t-1)} (-0.37***)$ ===== $RMS = 43.81$                                                                                                                                                                                                                                                                                                                                                                                                                                                                                                                                                                                                                                                   |
| 7 | Anti-immigrant populist party support (1990 to 2002) = $\text{Moving average (t-1)} (-0.46***) + \text{Rise Fortuyn (1.18***)} + \text{Dead Fortuyn (t-4)} (-1.18***)$ ===== $RMS = 40.06$                                                                                                                                                                                                                                                                                                                                                                                                                                                                                                                                                                            |
| 7 | Anti-immigrant populist party support (1990 to 2002) = $\text{Moving average (t-1)} (-0.37***) + \text{Rise Fortuyn (0.76*)} + \text{Dead Fortuyn (t-4)} (-1.16***) + \text{Immigration (t-1)} (0.50**) + \text{Unemployment (t-2)} (-3.59***) + \text{Unemployment} \times \text{immigration (t-7)} (0.33***)$ ===== $RMS = 34.65$                                                                                                                                                                                                                                                                                                                                                                                                                                   |
| 7 | Anti-immigrant populist party support (1990 to 2002) = $\text{Moving average (t-1)} (-0.39***) + \text{Rise Fortuyn (0.79*)} + \text{Dead Fortuyn (t-4)} (-1.09***) + \text{Immigration (t-1)} (0.73***) + \text{Unemployment (t-2)} (-3.51***) + \text{Unemployment} \times \text{immigration (t-7)} (0.29**) + \text{News on immigration (t-3)} (0.38**) + \text{News on economy (t-1)} (0.40*)$ ===== $RMS = 33.25$                                                                                                                                                                                                                                                                                                                                                |
| 8 | UKIP support = $\text{Religious minorities } -0.30** + \text{Economically deprived } -0.24** + \text{Young mobile } -0.22** + \text{Low status employees } 0.17**$                                                                                                                                                                                                                                                                                                                                                                                                                                                                                                                                                                                                    |
| 8 | BNP support = $\text{Religious minorities } -0.28** + \text{Economically deprived } -0.10** + \text{Young mobile } -0.28** + \text{Low status employees } 0.54**$                                                                                                                                                                                                                                                                                                                                                                                                                                                                                                                                                                                                     |
| 8 | UKIP support = $\text{Religious minorities } -0.29** + \text{Economically deprived } -0.23** + \text{Young mobile } -0.21** + \text{Low status employees } 0.18** + \text{Party's candidate at 2002 election (dummy variable)} 0.04 + \text{Conservative ward (dummy variable)} 0.03 + \text{Labour ward (dummy variable)} -0.05$                                                                                                                                                                                                                                                                                                                                                                                                                                     |
| 8 | BNP support = $\text{Religious minorities } -0.27** + \text{Economically deprived } -0.09** + \text{Young mobile } -0.28** + \text{Low status employees } 0.54** + \text{Party's candidate at 2002 election (dummy variable)} 0.27** + \text{Conservative ward (dummy variable)} 0.02 + \text{Labour ward (dummy variable)} -0.03$                                                                                                                                                                                                                                                                                                                                                                                                                                    |
| 9 | The support for British National Party 2002 = $\% \text{ Black, district (4.22*)} + \% \text{ Indian, district } 0.52 (1.64) + \% \text{ Pakistani/Bangladeshi, district (2.81**)} + \% \text{ Black, ward } (-2.44*) + \% \text{ Indian, ward } (-1.15) + \% \text{ Pakistani/Bangladeshi, ward } (-0.96**) + \text{Population density (0.08)} + \% \text{ With high education } (-2.42**) + \text{Change in median house price } (-0.58*) + \% \text{ Living in council housing } (-1.03) + \text{Homeownership rate (0.00)} + \% \text{ Living in over-crowded home (2.86*)} + \text{Unemployment rate } (-4.94) + \% \text{ Employed in manufacturing } (-0.01) + \text{Crime rate (0.12)} + \text{Labour control of council (0.07)}$ ===== $\text{Sigma} = 0.40$ |

|    |                                                                                                                                                                                                                                                                                                                                                                                                                                                                                                                                                                                                                                                                                                                                                                                                                              |
|----|------------------------------------------------------------------------------------------------------------------------------------------------------------------------------------------------------------------------------------------------------------------------------------------------------------------------------------------------------------------------------------------------------------------------------------------------------------------------------------------------------------------------------------------------------------------------------------------------------------------------------------------------------------------------------------------------------------------------------------------------------------------------------------------------------------------------------|
| 9  | The support for British National Party 2003 = % Black, district (-1.22) + % Indian, district (0.91) + % Pakistani/Bangladeshi, district (3.23**) + % Black, ward (-8.10**) + % Indian, ward (-0.56) + % Pakistani/Bangladeshi, ward (-1.11*) + Population density (0.21*) + % With high education (-1.55**) + Change in median house price (-0.28) + % Living in council housing (0.37) + Homeownership rate (0.12) + % Living in over-crowded home (2.37**) + Unemployment rate (-1.58) + % Employed in manufacturing (0.42) + Crime rate (0.30) + Labour control of council (0.01) ===== Segma= 0.34                                                                                                                                                                                                                       |
| 10 | ELECTORAL SUPPORT FOR THE NEW RIGHT = Foreign Population (-1.932*) + Crime (3.561 *) + Unemployment (-0.024) =====< R2= 0.705                                                                                                                                                                                                                                                                                                                                                                                                                                                                                                                                                                                                                                                                                                |
| 11 | ΔUKIP vote intentions at time t = ΔEU Membership(t) -0.160*** 0.033 + UKIP Support(t - 1) -0.112** 0.047 + EU Membership(t - 1) -0.049* 0.022                                                                                                                                                                                                                                                                                                                                                                                                                                                                                                                                                                                                                                                                                |
| 11 | ΔUKIP vote intentions at time t = EGARCH-M(t) 0.373*** 0.062 + ΔEU Membership(t) -0.068*** 0.010 + UKIP Support(t - 1) -0.164*** 0.022 + EU Membership(t - 1) -0.018*** 0.003 + ΔEconomic Reactions(t) -0.081*** 0.025 + ΔNational Health Service(t - 1) -0.344*** 0.030 + ΔAnti-Immigration Attitudes(t - 2) 0.091* 0.028 + 2004 EP Election(t) 2.400*** 0.362 + 2009 EP Election(t) 1.02 0.931 + 2005 General Election(t) 1.509*** 0.359 + 2010 General Election(t) -0.029 0.320 + 2012 Budget(t) 1.279*** 0.160 + Cameron EU Speech(t) 3.687*** 0.338 + UKIP Councillor Suspended(t) -1.366** 0.412                                                                                                                                                                                                                       |
| 12 | Tobit I estimation of Vlaams Blok's (latent) vote share = Per capita income (0.024***) + Unemployment (-0.799**) + Income inequality (-0.004***) + Population from Maghreb and Turkey (1.810***) + Population from other countries (-0.174) + Crime (0.284*) + Associational life (-11.132) + population density (22.803*) + District magnitude (0.005***) + Effective number of parties in government (0.021**) + Maximum ideological distance government (-0.004) =====< Sigma= 0.067                                                                                                                                                                                                                                                                                                                                      |
| 12 | Tobit II estimation of Vlaams Blok's electoral success (FIML) = Per capita income (0.073***) + Unemployment (-1.102) + Income inequality (-0.006) + Population from Maghreb and Turkey (13.516***) + Population from other countries (-0.901) + Crime (0.273) + Associational life (-232.710***) + population density (192.268***) + District magnitude (-0.004) + Effective number of parties in government (0.066) + Maximum ideological distance government (-0.035) =====< Sigma= 0.359                                                                                                                                                                                                                                                                                                                                  |
| 12 | OLS estimation of Vlaams Blok's vote share in federal elections 1999 = Per capita income (0.052*) + Unemployment (2.344) + Population from Maghreb and Turkey (7.096***) + Population from other countries (-1.542*) + Crime (0.804) + Associational life (-111.149**) + population density (277.534**) + District magnitude (0.006) =====< R2= 0.518                                                                                                                                                                                                                                                                                                                                                                                                                                                                        |
| 13 | Log of the share of vote obtained by the Swedish democrats in 2010 = Ln (SD share 2006) 0.64*** (0.02) + Mean toughness 1.08*** (0.27)                                                                                                                                                                                                                                                                                                                                                                                                                                                                                                                                                                                                                                                                                       |
| 13 | Log of the share of vote obtained by the Swedish democrats in 2010 = Ln (SD share 2006) 0.66*** (0.02) + Max toughness 0.16 (0.13)                                                                                                                                                                                                                                                                                                                                                                                                                                                                                                                                                                                                                                                                                           |
| 13 | Log of the share of vote obtained by the Swedish democrats in 2010 = Ln (SD share 2006) 0.60*** (0.04) + Mean toughness 1.03*** (0.32) + % Men 2009 0.02 (0.04) + Median income 2009 (1000 SEK) 0.00 (0.00) + Ln (Proportion of highly educated 2009) -0.44*** (0.14) + Ln (Population 2009) 0.07 (0.05) + Ln (Area 2009) 0.03 (0.03) + % Non-Nordic immigrants 2009 0.02*** (0.01) + Crime/1000 cap. 2010 0.00 (0.00) + Unemployment 2009 0.00 (0.04) + New Democracy vote share 1991 0.01 (0.01) + Nationalist vote share 1936 0.02 (0.01) + Mean age in the population 2009 0.87*** (0.22) + (Mean age)2 -0.01*** (0.00) + Left party 0.01 (0.01) + Green party 0.01 (0.01) + Center party 0.00 (0.00) + Liberals -0.01 (0.01) + Christian Democrats 0.00 (0.01) + Conservatives 0.01 (0.00) + Other parties 0.01* (0.00) |

|    |                                                                                                                                                                                                                                                                                                                                                                                                                                                                                                                                                                                                                                                                                                                                                                                                                                               |
|----|-----------------------------------------------------------------------------------------------------------------------------------------------------------------------------------------------------------------------------------------------------------------------------------------------------------------------------------------------------------------------------------------------------------------------------------------------------------------------------------------------------------------------------------------------------------------------------------------------------------------------------------------------------------------------------------------------------------------------------------------------------------------------------------------------------------------------------------------------|
| 13 | Log of the share of vote obtained by the Swedish democrats in 2010 = Ln (SD share 2006) 0.62*** (0.03) + Max toughness 0.06 (0.13) + % Men 2009 0.01 (0.04) + Median income 2009 (1000 SEK) - 0.00 (0.00) + Ln (Proportion of highly educated 2009) - 0.42*** (0.14) + Ln (Population 2009) 0.03 (0.05) + Ln (Area 2009) 0.03 (0.03) + % Non-Nordic immigrants 2009 0.02*** (0.01) + Crime/1000 cap. 2010 0.00 (0.00) + Unemployment 2009 0.00 (0.04) + New Democracy vote share 1991 0.01 (0.01) + Nationalist vote share 1936 0.01 (0.01) + Mean age in the population 2009 0.93*** (0.23) + (Mean age) <sup>2</sup> - 0.01*** (0.00) + Left party 0.01 (0.01) + Green party 0.01 (0.01) + Center party 0.00 (0.00) + Liberals -0.01 (0.01) + Christian Democrats 0.00 (0.01) + Conservatives 0.01* (0.00) + Other parties 0.01** (0.00)    |
| 13 | Log of the share of vote obtained by the Swedish democrats in 2010 = Ln (SD share 2006) 0.42*** (0.05) + Mean toughness 0.83*** (0.27) + % Men 2009 0.01 (0.03) + Median income 2009 (1000 SEK) 0.00 (0.00) + Ln (Proportion of highly educated 2009) - 0.45*** (0.16) + Ln (Population 2009) 0.07 (0.05) + Ln (Area 2009) 0.05* (0.03) + % Non-Nordic immigrants 2009 0.02*** (0.01) + Crime/1000 cap. 2010 -0.00 (0.00) + Unemployment 2009 -0.00 (0.04) + New Democracy vote share 1991 0.02 (0.01) + Nationalist vote share 1936 0.01 (0.02) + Mean age in the population 2009 0.36* (0.20) + (Mean age) <sup>2</sup> -0.00* (0.00) + Left party -0.01 (0.01) + Green party 0.01 (0.01) + Center party 0.00 (0.00) + Liberals -0.02** (0.01) + Christian -Democrats 0.01 (0.01) + Conservatives -0.00 (0.00) + Other parties -0.00 (0.00) |
| 13 | Log of the share of vote obtained by the Swedish democrats in 2010 = Ln (SD share 2006) 0.44*** (0.05) + Max toughness 0.02 (0.13) + % Men 2009 0.01 (0.03) + Median income 2009 (1000 SEK) 0.00 (0.00) + Ln (Proportion of highly educated 2009) -0.45*** (0.16) + Ln (Population 2009) 0.04 (0.05) + Ln (Area 2009) 0.05* (0.03) + % Non-Nordic immigrants 2009 0.02*** (0.01) + Crime/1000 cap. 2010 -0.00 (0.00) + Unemployment 2009 0.00 (0.04) + New Democracy vote share 1991 0.02 (0.02) + Nationalist vote share 1936 0.01 (0.02) + Mean age in the population 2009 0.37* (0.23) + (Mean age) <sup>2</sup> - 0.00* (0.00) + Left party 0.00 (0.01) + Green party 0.00(0.01) + Center party 0.00 (0.00) + Liberals -0.01** (0.01) + Christian Democrats 0.01 (0.01) + Conservatives 0.00 (0.00) + Other parties 0.00 (0.00)           |
| 13 | Log of the share of vote obtained by the Swedish democrats in 2010 = Left toughness 0.54** (0.21) + Right toughness 0.35 (0.24) + Ln (SD share 2006) (Beta value not specified)                                                                                                                                                                                                                                                                                                                                                                                                                                                                                                                                                                                                                                                               |
| 13 | Log of the share of vote obtained by the Swedish democrats in 2010 = Left toughness 0.48** (0.23) + Right toughness 0.28 (0.26) + Control variables (Beta value not specified)                                                                                                                                                                                                                                                                                                                                                                                                                                                                                                                                                                                                                                                                |
| 13 | Log of the share of vote obtained by the Swedish democrats in 2010 = Left toughness 0.36* (0.23) + Right toughness 0.21 (0.25) + Control variables (Beta value not specified)                                                                                                                                                                                                                                                                                                                                                                                                                                                                                                                                                                                                                                                                 |
| 14 | Model 1 (aggregate) (Y = vote share LPF) ===== Vote share for List Pim Fortuyn= Immigration rate (0.380)+ Crime rate (0.297)+Unemployment rate (2.27)+ Income (0.174)+Economic equality (0.064)+Population density (0.001)+Social capital (-0.371)=====R <sup>2</sup> =0.346                                                                                                                                                                                                                                                                                                                                                                                                                                                                                                                                                                  |
| 15 | Party scores for legislative elections (Extreme right) = Presidential score 0.71*** + Previous legislative election score 0.2***+ Difference in turnout 0.04*** + Midterm, opposition 0.05 *** + Honeymoon, opposition - 0.05                                                                                                                                                                                                                                                                                                                                                                                                                                                                                                                                                                                                                 |
| 16 | Regression models of FN vote (1984–2007) = Presidential (election type) 3.26 (1.71)                                                                                                                                                                                                                                                                                                                                                                                                                                                                                                                                                                                                                                                                                                                                                           |
| 16 | Regression models of FN vote (1984–2007) (without 2007 presidential election) = Presidential (election type) 4.50 (1.86)*                                                                                                                                                                                                                                                                                                                                                                                                                                                                                                                                                                                                                                                                                                                     |
| 16 | Regression models of FN vote (1984–2007) (without 2007 presidential election) = Presidential (election type) 5.49 (1.16)* + Variation Immigration 0.11 (0.02)* + variation Unemployment 2.96 (0.64)* + Variation Crime -0.08 (0.14)                                                                                                                                                                                                                                                                                                                                                                                                                                                                                                                                                                                                           |
| 16 | Regression models of FN vote (1984–2007) (without 2007 presidential election) = Presidential (election type) 4.93 (0.87)* + Variation Immigration 0.11 (0.02)* + variation Unemployment 2.16 (0.53)* + opposition popularity 0.11 (0.03)*                                                                                                                                                                                                                                                                                                                                                                                                                                                                                                                                                                                                     |

|    |                                                                                                                                                                                                                                                                                                                                                                                                                                                                                                                                           |
|----|-------------------------------------------------------------------------------------------------------------------------------------------------------------------------------------------------------------------------------------------------------------------------------------------------------------------------------------------------------------------------------------------------------------------------------------------------------------------------------------------------------------------------------------------|
| 17 | FN voting in FIRST ORDER elections as percent of valid cast (1974–2007) = <b>Type of elections</b> ( presidential 1/ legislative 0) 4.56 (0.59)* + <b>Variation immigration</b> 0.12 (0.01)* + <b>Unemployment</b> 2.15 (0.14)                                                                                                                                                                                                                                                                                                            |
| 17 | FN voting in SECOND ORDER elections as percent of valid cast (1984–2011) = <b>per cent vote FN in previous election</b> 0.36 0.08* + <b>FN popularity as measured by SOFRES</b> 1.38 0.13* + <b>per cent time elapsed in first-order cycle</b> 0.02 0.01* + <b>Regional election</b> 1.05 0.68 + <b>European election</b> -1.22 0.58                                                                                                                                                                                                      |
| 18 | Share of vote of the Finns = <b>Factor 1 wealth</b> -0.391 + <b>Factor 2 Living situation</b> 0.620 + <b>Factor 3 Crime</b> -0.079 + <b>Factor 4 Population Growth</b> -0.079                                                                                                                                                                                                                                                                                                                                                             |
| 19 | National Front total vote share in National Assembly elections, first round = <b>Left coalition</b> -2.07*** (5.24) + <b>FNt-1</b> 0.70*** (41.99)                                                                                                                                                                                                                                                                                                                                                                                        |
| 19 | National Front total vote share in National Assembly elections, first round= <b>Right coalition</b> 1.52*** (6.53) + <b>FNt-1</b> 0.68*** (42.45)                                                                                                                                                                                                                                                                                                                                                                                         |
| 19 | National Front total vote share in National Assembly elections, first round= <b>Left coalition</b> -2.01*** (5.15) + <b>Right coalition</b> 1.49*** (6.46) + <b>FNt-1</b> 0.70*** (42.68)                                                                                                                                                                                                                                                                                                                                                 |
| 19 | National Front total vote share in National Assembly elections, first round= <b>Left coalition</b> -1.96*** + <b>Right coalition</b> 0.51** (2.40) + <b>FNt-1</b> 0.81*** (51.28) + <b>Number of parties</b> -0.46***                                                                                                                                                                                                                                                                                                                     |
| 19 | National Front total vote share in National Assembly elections, first round= <b>Right UDF coalition</b> 2.07*** (10.44) + <b>FNt-1</b> 0.69*** (43.89)                                                                                                                                                                                                                                                                                                                                                                                    |
| 19 | National Front total vote share in National Assembly elections, first round= <b>Right coalition</b> 0.88*** (3.68) + <b>Right UDF coalition</b> 1.84*** (8.87) + <b>FNt-1</b> 0.69*** (44.08)                                                                                                                                                                                                                                                                                                                                             |
| 19 | National Front total vote share in National Assembly elections, first round= <b>Left coalition</b> -1.79*** (4.67) + <b>Right UDF coalition</b> 2.65*** (10.07) + <b>Right RPR coalition</b> 0.87*** (3.69)+ <b>FNt-1</b> 0.72*** (44.13)                                                                                                                                                                                                                                                                                                 |
| 20 | Predicting commune level SVP support, 2003 = <b>In-commune workers</b> .05 (.01)* + <b>Strength majority language</b> .24 (.03)* + <b>Owner occupied housing</b> .13 (.01)* + <b>Unemployment</b> .23 (.19) + <b>Foreign population</b> .39 (.03)* + <b>Non-European language</b> 1.90 (.79)* + <b>Low education</b> .20 (.03)* + <b>Medium education</b> .34 (.04)*+ <b>Primary sector workers</b> .20 (.01)*+ <b>Secondary sector workers</b> .004 (.01) + <b>Agricultural land</b> .06 (.01)* + <b>Population (/1000)</b> -.03 (.002)* |
| 20 | Predicting commune level SVP support, 2003 = <b>Cohesion index</b> .26 (.03)* + <b>Unemployment</b> .01 (.18) + <b>Foreign population</b> 0.30(0.03)* + <b>Non-European language</b> 2.19 (.80)* + <b>Low education</b> .19 (.03)* + <b>Medium education</b> .41 (.04)*+ <b>Primary sector workers</b> .22 (.01)*+ <b>Secondary sector workers</b> .01 (.01) + <b>Agricultural land</b> .07 (.01)* + <b>Population (/1000)</b> -.03 (.002)*                                                                                               |
| 20 | Predicting commune level SVP support, 2003 = <b>Cohesion index</b> .50 (.04)* + <b>Unemployment</b> 6.23 (.83)* + <b>Foreign population</b> .27 (.03)* + <b>Non-European language</b> 2.46 (.79)* + <b>Low education</b> .13 (.03)* + <b>Medium education</b> .36 (.04)*+ <b>Primary sector workers</b> .19 (.01)*+ <b>Secondary sector workers</b> .01 (.01) + <b>Agricultural land</b> .08 (.01)* + <b>Population (/1000)</b> -.03 (.002)* + <b>Cohesion X Unemployment</b> -.11 (.01)*                                                 |
| 20 | Predicting commune level SVP support, 2003 = <b>Cohesion index</b> .42 (.04)* + <b>Unemployment</b> .07 (.18) + <b>Foreign population</b> .74 (.09)* + <b>Non-European language</b> 2.30 (.80)* + <b>Low education</b> .14 (.03)* + <b>Medium education</b> .38 (.04)*+ <b>Primary sector workers</b> .20 (.01)*+ <b>Secondary sector workers</b> .01 (.01) + <b>Agricultural land</b> .08 (.01)* + <b>Population (/1000)</b> -.03 (.002)* + <b>Cohesion X Foreign</b> -.01 (.002)*                                                       |

|    |                                                                                                                                                                                                                                                                                                                                                                                                                       |
|----|-----------------------------------------------------------------------------------------------------------------------------------------------------------------------------------------------------------------------------------------------------------------------------------------------------------------------------------------------------------------------------------------------------------------------|
| 20 | ROBUST CHEKS Predicting commune level SVP support, 2003 = Cohesion index .26 (.03)* + Unemployment .01 (.18) + Foreign population .31 (.03)* + Low education .19 (.03)* + Medium education .41 (.04)* + Primary sector workers .22 (.01)* + Secondary sector workers .01 (.01) + Agricultural land .07 (.01)* + Population (/1000) -.03 (.002)*                                                                       |
| 20 | ROBUST CHEKS Predicting commune level SVP support, 2003 = Cohesion index .21 (.03)* + Unemployment -2.45 (.29)* + Foreign population .04 (.04) + Non-European language 2.25 (.78)* + Low education .18 (.03)* + Medium education .38 (.04)* + Primary sector workers .18 (.01)* + Secondary sector workers .01 (.01) + Agricultural land .08 (.01)* + Population (/1000) -.03 (.002)* + Cohesion X Foreign .09 (.01)* |
| 20 | ROBUST CHEKS Predicting commune level SVP support, 2003 = Cohesion index .26 (.04)* + Unemployment -.85 (.24)* + Foreign population .20 (.04)* + Non-European language 2.09 (1.11) + Low education .17 (.03)* + Medium education .38 (.04)* .20 (.04)* + Primary sector workers .14 (.01)* + Secondary sector workers .01 (.01) + Agricultural land .07 (.01)* + Population (/1000) -.05 (.02)*                       |
| 21 | The vote for extreme right parties= Threshold ( 0.276*)+ Effective number of parties ( 1,172*) +Effective number of parties x Threshold (-0.103*) +Unemployment (0.066*) =====R2= 0.731                                                                                                                                                                                                                               |
| 21 | The vote for extreme right parties= Threshold ( 0.165*)+ Effective number of parties ( 0,837) +Effective number of parties x Threshold (-0.065*) +Unemployment (0.091*) =====R2=0.637                                                                                                                                                                                                                                 |
| 21 | The vote for extreme right parties= Threshold (- 0.027)+Unemployment (0.097*) =====R2=0.601                                                                                                                                                                                                                                                                                                                           |
| 22 | Vote share vote of Extreme Right Parties Combined = UNEMP 0.01 (0.16) + IMMIG 2.39** + LOGMAG 2.11* + UPPER 0.51** ===== Log likelihood = -258.84                                                                                                                                                                                                                                                                     |
| 22 | Vote share of Neo-fascist Parties Separate = UNEMP -0.18** + IMMIG 0.30 + LOGMAG 1.56** + UPPER -0.08 =====Log likelihood = -85.67                                                                                                                                                                                                                                                                                    |
| 22 | Vote share of Populist Parties =UNEMP 0.48 + IMMIG 2.05** + LOGMAG 3.43** + UPPE 1.63**=====Log likelihood = -157.39                                                                                                                                                                                                                                                                                                  |
| 22 | Vote share Received by Extreme Right Parties Combined= UNEMP -0.22 + IMMIG 2.02** + UNEMP*IMMIG 0.06 + LOGMAG 2.00* + UPPER 0.51** =====Log likelihood = -257.99                                                                                                                                                                                                                                                      |
| 22 | Vote share Received by Neo-fascist Parties Separately: Populist Parties Separately= UNEMP -0.20** + IMMIG 0.25 + UNEMP*IMMIG 0.01 + LOGMAG 1.54** + UPPER -0.08 =====Log likelihood = -85.67                                                                                                                                                                                                                          |
| 22 | Vote share Received by Populist Parties Separately = UNEMP -0.86 + IMMIG 0.87 + UNEMP*IMMIG 0.22** + LOGMAG 3.69** + UPPER 1.97** =====Log likelihood = -154.55                                                                                                                                                                                                                                                       |
| 22 | Vote share Received by Populist Parties= IMMIG 0.87 (1.33) + LOGMAG 1.69 (2.38) + IMMIG*LOGMAG 0.45 (0.46) + UNEMP 0.52* (0.30)+ UPPER 1.40** (0.50)=====Log likelihood -156.93                                                                                                                                                                                                                                       |
| 23 | Extreme Right-Wing Party Support= THRESH (-0.022)+ ENPP( 0.343) + UNEMP (0.074*) =====R2= 0.656                                                                                                                                                                                                                                                                                                                       |
| 23 | Extreme Right-Wing Party Support= THRESH (0.276*)+ ENPP( 1.172*) + THRESH*ENPP( - 0.103*)+UNEMP( 0.066*)=====R2= 0.731                                                                                                                                                                                                                                                                                                |
| 23 | Extreme Right-Wing Party Support= THRESH (0.410*)+ ENPP( 1.362* ) + THRESH*ENPP( -0.145* )+UNEMP( 0.022 )=====R2= 0.896                                                                                                                                                                                                                                                                                               |

|    |                                                                                                                                                                                                                                                                                                                                                                                |
|----|--------------------------------------------------------------------------------------------------------------------------------------------------------------------------------------------------------------------------------------------------------------------------------------------------------------------------------------------------------------------------------|
| 24 | National Front vote share (VFNP1) = National Front at past legislative elections 0.56 (9.33*) + Unemployment change 2.00 (3.83*) + Local Sarkozy's electoral puncture -4.82 (6.08*) + FN's areas of weakness -3.57 (6.53*) + Outliers Corsica in 2002 -6.36 (6.53*)                                                                                                            |
| 25 | Percent vote for extreme right parties = Immigration rate (0.062) + Unemployment rate (-0.088***) + (income inequality)(-0.005) + Fiscal redistribution (0.016)                                                                                                                                                                                                                |
| 25 | Percent vote for extreme right parties = Immigration rate (-0.517) + Unemployment rate (-0.168) + (income inequality)(-0.047) + Fiscal redistribution (0.059**) + Immigration*unemployment (0.027)** + Immigration *redistribution (-0.013)** + Immigration income inequality (0.002)                                                                                          |
| 26 | Progress Party voter support (local election) = Non-Western Immigrants 0.07 + Western Immigrants -0.021 + control variables (Beta coefficients not reported)                                                                                                                                                                                                                   |
| 26 | Progress Party voter support (local election) = Non-Western Immigrants 1.208*** + Quadratic Non-Western Immigrants -0.147*** + Western Immigrants 0.443 + Western Immigrants (quadratic term) -0.039* + control variables (Beta coefficients not reported)                                                                                                                     |
| 26 | Progress Party voter support (local election) = Non-Western Immigrants 1.366*** + Non-Western Immigrants (quadratic term) -0.199*** + Western Immigrants 0.141 + Western Immigrants -0.032 (quadratic term) + control variables (Beta coefficients not reported)                                                                                                               |
| 26 | Progress Party voter support (national election) = Non-Western Immigrants 0.296* + Western Immigrants 0.020 + control variables (Beta coefficients not reported)                                                                                                                                                                                                               |
| 26 | Progress Party voter support (national election) = Non-Western Immigrants 0.977** + Non-Western Immigrants (quadratic term) -0.096*** + Western Immigrants -0.014 + Western Immigrants 0.002 (quadratic term) + control variables (Beta coefficients not reported)                                                                                                             |
| 26 | Progress Party voter support (national election) = Non-Western Immigrants 0.792*** + Non-Western Immigrants (quadratic term) -0.099*** + Western Immigrants -0.159 + Western Immigrants 0.012 (quadratic term) + control variables (Beta coefficients not reported)                                                                                                            |
| 26 | Difference in Progress Party voter support (local election) = Non-Western Immigration 0.584* + Quadratic Non-Western Immigration -0.079** + control variables (Beta coefficients not reported)                                                                                                                                                                                 |
| 26 | Difference in Progress Party voter support (local election) = Non-Western Immigration 0.618 + Quadratic Non-Western Immigration -0.087* + The percentage of non-Western immigrants living in the economic region 0.188 + Quadratic The percentage of non-Western immigrants living in the economic region -0.049 + control variables (Beta coefficients not reported)          |
| 26 | Difference in Progress Party voter support (National election) = Non-Western Immigration 0.637* + Quadratic Non-Western Immigration -0.018* + The percentage of non-Western immigrants living in the economic region -0.787 + Quadratic The percentage of non-Western immigrants living in the economic region 0.503** + control coefficients (Beta coefficients not reported) |

|    |                                                                                                                                                                                                                                                                                                                                                                                                                                                                                                                                                              |
|----|--------------------------------------------------------------------------------------------------------------------------------------------------------------------------------------------------------------------------------------------------------------------------------------------------------------------------------------------------------------------------------------------------------------------------------------------------------------------------------------------------------------------------------------------------------------|
| 26 | Difference in Progress Party voter support (local election) = The accumulated settlement requests ( of immigrants to relocate) 0.681* + Quadratic The accumulated settlement requests ( of immigrants to relocate) -0.087** + The number of decisions made by municipal council about the requests ( of immigrants) -0.255 + Quadratic The number of decisions made by municipal council about the requests (of immigrants) 0.025 + control variables ( Beta coefficients not reported)                                                                      |
| 26 | Difference in Progress Party voter support (local election) = The accumulated settlement requests ( of immigrants to relocate) 0.095 + Quadratic The accumulated settlement requests ( of immigrants to relocate) -0.003 + The number of decisions made by municipal council about the requests ( of immigrants)0.083 + Quadratic The number of decisions made by municipal council about the requests (of immigrants)-0.010 + control variables ( Beta coefficients not reported)                                                                           |
| 26 | ROBUST MODEL Progress party voter support (local election) = Non-Western Immigrants 1.167*** + Non-Western Immigrants (quadratic term) - 0.271*** + Western Immigrants 0.158 + Western Immigrants -0.022 (quadratic term) + control variables ( Beta coefficients not reported)                                                                                                                                                                                                                                                                              |
| 26 | ROBUST MODEL Progress party voter support (local election) = Non-Western Immigrants 1.366*** + Quadratic Non-Western Immigrants - 0.199*** + Western Immigrants 0.141 + Quadratic Western Immigrants -0.032 + control variables ( Beta coefficients not reported)                                                                                                                                                                                                                                                                                            |
| 26 | ROBUST MODEL Progress party voter support (national election) = Non-Western Immigrants 0.846*** +Non-Western Immigrants (quadratic term) -0.128*** + Western Immigrants -0.007 + Western Immigrants 0.007 (quadratic term) + control variables ( Beta coefficients not reported)                                                                                                                                                                                                                                                                             |
| 26 | ROBUST MODEL Progress party voter support (national election) = Non-Western Immigrants 0.792*** +*Non-Western Immigrants (quadratic term) -0.099*** + Western Immigrants -0.159 + Western Immigrants 0.012 (quadratic term) + control variables ( Beta coefficients not reported)                                                                                                                                                                                                                                                                            |
| 26 | Progress party voter support (local election) = Non-Western Immigrants 0.917*** +Non-Western Immigrants (quadratic term) -0.013 + Western Immigrants 0.161 + Western Immigrants -0.000 (quadratic term) + Number of years since immigrants have been present in the municipality 0.118* + Non-Western Immigrants* Number of years since immigrants have been present in the municipality -0.053*** + Western Immigrants* Number of years since immigrants have been present in the municipality -0.019 + control variables (coefficients not reported)       |
| 26 | Progress party voter support (local election) = Variation of Non-Western Immigrants 0.791** + Variation of Non-Western Immigrants *Non-Western Immigrants -0.318*** + Variation of Western Immigrants 0.077 + Variation of Western Immigrants * Western Immigrants -0.064 + control variables ( Beta coefficients not reported)                                                                                                                                                                                                                              |
| 26 | Progress party voter support (national election) = Non-Western Immigrants 0.792*** +Non-Western Immigrants (quadratic term) -0.034 + Western Immigrants -0.115 + Western Immigrants 0.012 (quadratic term) + Number of years since immigrants have been present in the municipality 0.028 + Non-Western Immigrants* Number of years since immigrants have been present in the municipality -0.018* + Western Immigrants* Number of years since immigrants have been present in the municipality -0.011 + control variables ( Beta coefficients not reported) |
| 26 | Progress party voter support (national election) = Variation of Non-Western Immigrants 0.325** + Variation of Non-Western Immigrants *Non-Western Immigrants -0.083* + Variation of Western Immigrants -0.012 + Variation of Western Immigrants * Western Immigrants 0.011 + control variables ( Beta coefficients not reported)                                                                                                                                                                                                                             |

|    |                                                                                                                                                                                                                                                                                                                                                                                                                                                 |
|----|-------------------------------------------------------------------------------------------------------------------------------------------------------------------------------------------------------------------------------------------------------------------------------------------------------------------------------------------------------------------------------------------------------------------------------------------------|
| 26 | Progress party voter support (local election) = <b>Non-Western Immigrants 1.387***</b> + <b>Non-Western Immigrants (quadratic term) -0.201***</b> + <b>Western Immigrants 0.124</b> + <b>Western Immigrants-0.030 (quadratic term)</b> + <b>Unemployment rate 0.301</b> + Non-Western Immigrants * Unemployment rate -0.038 + Western Immigrants * Unemployment rate -0.019 + <b>control variables (Beta coefficients not reported)</b>         |
| 26 | Progress party voter support (national election) = <b>Non-Western Immigrants 0.738***</b> + <b>Non-Western Immigrants (quadratic term) -0.094***</b> + <b>Western Immigrants 0.003</b> + <b>Western Immigrants-0.014 (quadratic term)</b> + <b>Unemployment rate -0.407***</b> + Non-Western Immigrants * Unemployment rate 0.062 + Western Immigrants * Unemployment rate 0.167*** + <b>control variables (Beta coefficients not reported)</b> |
| 27 | Election results by ward from 2010 to 2012 for The BNP = <b>% Minority (non-European) 2001 -0.124*</b> + <b>Minority change (non-European) 2001e11 0.188**</b> + <b>Total population 0.000*</b> + <b>% Working class 0.214***</b> + <b>% Elderly -0.228***</b>                                                                                                                                                                                  |
| 27 | Election results by ward from 2010 to 2012 for the UKIP = <b>% Minority (non-European) 2001 -0.059*</b> + <b>Minority change (non-European) 2001-11 -0.049</b> + <b>Total population 0.000***</b> + <b>% Working class 0.218***</b> + <b>% Elderly 0.120*</b>                                                                                                                                                                                   |
| 28 | THE VOTE SHARE OF THE NORWEGIAN PROGRESS PARTY IN MUNICIPALITIES (Parliamentary elections 2005) = <b>LnDM 3.913***</b> + <b>ENEP 1.482***</b> + <b>TURNOUT 0.035</b> + <b>IMMIG 1.132***</b> + <b>UNEMP 0.183</b> ===== Schwarz criterion= 6.34                                                                                                                                                                                                 |
| 28 | THE VOTE SHARE OF THE NORWEGIAN PROGRESS PARTY IN MUNICIPALITIES (Parliamentary elections 2001) = <b>LnDM 2.017***</b> + <b>ENEP 0.993***</b> + <b>TURNOUT 0.104</b> + <b>IMMIG 0.675***</b> + <b>UNEMP 0.330</b> ===== Schwarz criterion=5.74                                                                                                                                                                                                  |
| 28 | THE VOTE SHARE OF THE NORWEGIAN PROGRESS PARTY IN MUNICIPALITIES (Parliamentary elections 1997) = <b>LnDM 0.859</b> + <b>ENEP 3.015***</b> + <b>TURNOUT 0.192***</b> + <b>IMMIG 0.999***</b> + <b>UNEMP 0.416*</b> ===== Schwarz criterion=5.45                                                                                                                                                                                                 |
| 28 | THE VOTE SHARE OF THE NORWEGIAN PROGRESS PARTY IN MUNICIPALITIES (Municipal council elections. 2003) = <b>LnDM 13.502***</b> + <b>ENEP 3.995***</b> + <b>TURNOUT 0.195</b> + <b>IMMIG 0.201</b> + <b>UNEMP 0.714*</b> ===== Schwarz criterion= 5.77                                                                                                                                                                                             |
| 28 | THE VOTE SHARE OF THE NORWEGIAN PROGRESS PARTY IN MUNICIPALITIES (Municipal council elections.1999) = <b>LnDM 12.282***</b> + <b>ENEP 3.445***</b> + <b>TURNOUT 0.091</b> + <b>IMMIG 0.667*</b> + <b>UNEMP -0.224</b> ===== Schwarz criterion= 4.66                                                                                                                                                                                             |
| 28 | THE VOTE SHARE OF THE NORWEGIAN PROGRESS PARTY IN MUNICIPALITIES (Municipal council elections. 1995) = <b>LnDM 15.240***</b> + <b>ENEP 2.557***</b> + <b>TURNOUT 0.206*</b> + <b>IMMIG 1.081***</b> + <b>UNEMP -0.319</b> ===== Schwarz criterion= 3.7                                                                                                                                                                                          |
| 29 | Electoral support for FN list (%) = <b>District magnitude (ln) (-3.447***)</b> + <b>Effective number of party lists in 1998 (1.137*)</b> + <b>Turnout (%) (-0.736***)</b> + <b>Immigration (%) (0.150)</b> + <b>Unemployment (%) (1.582***)</b>                                                                                                                                                                                                 |
| 29 | Index of electoral success = <b>District magnitude (ln) (-0.122**)</b> + <b>Effective number of party lists in 1998 (0.051**)</b> + <b>Turnout (%) (-0.031***)</b> + <b>Immigration (%) (0.005)</b> + <b>Unemployment (0.049***)</b> ===== Adjusted R2= 0.454                                                                                                                                                                                   |
| 30 | Latent electoral support for extreme right-wing parties in Western Europe = <b>Support for extreme right-wing parties (lag 1) 0.69**</b> + <b>Unemployment -0.29**</b> + <b>Inflation -0.49</b> + <b>Immigration 0.64*</b> + <b>Immigration*Unemployment</b> + <b>Dissatisfaction with democracy** 0.13**</b> + <b>Denmark 2.09 **</b> + <b>France -0.60</b> + <b>Germany (west) 0.40</b> + <b>Italy -1.11</b> + <b>Netherlands 0.63</b>        |
| 31 | Determinants of public opinion support for Pim Fortuyn, 2001–2002 = <b>Moving average (t–1) -0.47***</b> + <b>The impact of 9/11(t–1) 0.07</b> + <b>Unemployment (t–1) 1.55</b> + <b>Immigration (t–1) -0.52</b> ===== RMS= 0.040                                                                                                                                                                                                               |

|    |                                                                                                                                                                                                                                                                                                                                                                                                                                                                                                                                                                                                                                                                                                                                                                                                          |
|----|----------------------------------------------------------------------------------------------------------------------------------------------------------------------------------------------------------------------------------------------------------------------------------------------------------------------------------------------------------------------------------------------------------------------------------------------------------------------------------------------------------------------------------------------------------------------------------------------------------------------------------------------------------------------------------------------------------------------------------------------------------------------------------------------------------|
| 31 | Determinants of public opinion support for Pim Fortuyn, 2001–2002= <b>Moving average (t–1) -0.59***</b> + 9/11(t–1) 0.08 + Unemployment (t–1) 0.71 + Immigration (t–1) -1.27 + Claims Fortuyn (t–1) 0.04 + Visibility (t–1) 0.06*** + Consonance (t–2) 0.07** + Dissonance (t–2) -0.01 + Negative claims immigration (t–1) -1.42 =====RMS =0.029                                                                                                                                                                                                                                                                                                                                                                                                                                                         |
| 32 | Changed levels of support for the SD (Local election 2002) = Number of candidates for office 17.75*** + candidates for office2 -14.66*** + Candidates' level of Candidates' qualification 0.884***                                                                                                                                                                                                                                                                                                                                                                                                                                                                                                                                                                                                       |
| 32 | changed levels of support for the SD (Local election 2002) = Number of candidates for office 16.67*** + candidates for office2 -13.80*** + Candidates' level of Candidates' qualification 0.856*** + Share of immigrants -0.00420 + Accepted refugees prior to election 0.0135 + Reported violent crimes per 1000 inhabitants 0.00193 + Unemployment 0.0114 + Proportion with post-secondary education -0.00436 + Ln (Population in municipality) 0.112 + Number of electoral districts -0.0435 + Number of parties in local council -0.0165 + Grand coalition prior to election 0.0153 + Mainstream party toughness on immigration -0.450                                                                                                                                                               |
| 32 | Changed levels of support for the SD (Local election 2002) = Number of candidates for office 41.33*** + candidates for office2 -11.19*** + Candidates' level of Candidates' qualification 1.069*** + Share of immigrants -0.00144 + Accepted refugees prior to election 0.0185+ Reported violent crimes per 1000 inhabitants 0.00503 + Unemployment0.00882 + Proportion with post-secondary education 0.00387 + Ln (Population in municipality) 0.0764+ Number of electoral districts -0.0744 + Number of parties in local council -0.00357+ Grand coalition prior to election 0.00485 + Mainstream party toughness on immigration -0.174 + Number of candidates for office*Candidates' level of qualification -14.17***                                                                                 |
| 32 | Changed levels of support for the SD (Local election 2006) = Number of candidates for office 7.537*** + candidates for office2 -7.078*** + Candidates' level of Candidates' qualification 0.176*** + Organizational stability 0.724***                                                                                                                                                                                                                                                                                                                                                                                                                                                                                                                                                                   |
| 32 | Changed levels of support for the SD (Local election 2006) = Number of candidates for office 0.659 + candidates for office2 -0.0973 + Candidates' level of Candidates' qualification 0.150*** + Organizational stability 0.613** + Share of immigrants -0.00455 + Accepted refugees prior to election-0.00805 + Reported violent crimes per 1000 inhabitants 0.0373** + Unemployment 0.0256 + Proportion with post-secondary education -0.0485*** + Ln (Population in municipality) 0.264*** + Number of electoral districts -0.262*** + Number of parties in local council 0.0217 + Grand coalition prior to election 0.149+ Mainstream party toughness on immigration 0.710 + Ln (SD votes in previous election) 0.0546                                                                                |
| 32 | Changed levels of support for the SD (Local election 2006) = Number of candidates for office 7.383*** + candidates for office2 -1.634 + Candidates' level of Candidates' qualification 0.171*** + Organizational stability 0.526** + Share of immigrants -0.00340 + Accepted refugees prior to election-0.00503+ Reported violent crimes per 1000 inhabitants 0.0372** + Unemployment 0.0246 + Proportion with post-secondary education -0.0460*** + Ln (Population in municipality) 0.238** + Number of electoral districts -0.248** + Number of parties in local council 0.0220 + Grand coalition prior to election 0.139+ Mainstream party toughness on immigration 0.538 + Ln (SD votes in previous election) 0.0624* + Number of candidates for office*Candidates' level of qualification -2.651*** |
| 32 | Changed levels of support for the SD (Local election 2010) = Number of candidates for office 6.672***+ candidates for office2 -6.938*** + Candidates' level of Candidates' qualification 0.0980*** + Organizational stability 0.205**                                                                                                                                                                                                                                                                                                                                                                                                                                                                                                                                                                    |
| 32 | Changed levels of support for the SD (Local election 2010) = Number of candidates for office 2.799***+ candidates for office2 -3.338***+ Candidates' level of Candidates' qualification 0.0717*** + Organizational stability 0.102* + Share of immigrants -0.00164 + Accepted refugees prior to election0.0470***+ Reported violent crimes per 1000 inhabitants 0.00189 + Unemployment 0.0139 + Proportion with post-secondary education -0.0319*** + Ln (Population in municipality)0.101** + Number of electoral districts -0.0459 + Number of parties in local council0.0272 + Grand coalition prior to election0.0944**+ Mainstream party toughness on immigration0.588** + Ln (SD votes in previous election) 0.221***                                                                              |

|    |                                                                                                                                                                                                                                                                                                                                                                                                                                                                                                                                                                                                                                                                                                                                                                                                                                                                                           |
|----|-------------------------------------------------------------------------------------------------------------------------------------------------------------------------------------------------------------------------------------------------------------------------------------------------------------------------------------------------------------------------------------------------------------------------------------------------------------------------------------------------------------------------------------------------------------------------------------------------------------------------------------------------------------------------------------------------------------------------------------------------------------------------------------------------------------------------------------------------------------------------------------------|
| 32 | <p>Changed levels of support for the SD (Local election 2010) = Number of candidates for office 5.734*** + candidates for office2 -2.425***+ Candidates' level of Candidates' qualification 0.103*** + Organizational stability 0.114* + Share of immigrants -0.00105 + Accepted refugees prior to election 0.0487***+ Reported violent crimes per 1000 inhabitants 0.00197 + Unemployment 0.0110 + Proportion with post-secondary education -0.0311*** + Ln (Population in municipality) 0.101** + Number of electoral districts-0.0441 + Number of parties in local council 0.0250 + Grand coalition prior to election 0.0899**+ Mainstream party toughness on immigration 0.564** + Ln (SD votes in previous election) 0.218*** + Number of candidates for office*Candidates' level of qualification -1.374***</p>                                                                     |
| 32 | <p>Changed levels of support for the SD (Local election 2014) = Number of candidates for office 4.222***+ candidates for office2 -3.414*** + Candidates' level of Candidates' qualification 0.0640* + Organizational stability 0.0750</p>                                                                                                                                                                                                                                                                                                                                                                                                                                                                                                                                                                                                                                                 |
| 32 | <p>Changed levels of support for the SD (Local election 2014) = Number of candidates for office 1.960***+ candidates for office2 -1.589***+ Candidates' level of Candidates' qualification 0.0702*** + Organizational stability-0.0550 + Share of immigrants -0.00272 + Accepted refugees prior to election 0.0190+ Reported violent crimes per 1000 inhabitants 0.0144**+ Unemployment 0.00343+ Proportion with post-secondary education -0.0209*** + Ln (Population in municipality)-0.0712* + Number of electoral districts -0.0162 + Number of parties in local council 0.0440**+ Grand coalition prior to election-0.00473+ Mainstream party toughness on immigration 0.0205 + Ln (SD votes in previous election) 0.427***</p>                                                                                                                                                       |
| 32 | <p>Changed levels of support for the SD (Local election 2014) = Number of candidates for office 4.139***+ candidates for office2 -1.631***+ Candidates' level of Candidates' qualification 0.129*** + Organizational stability-0.0655 + Share of immigrants-0.00001 + Accepted refugees prior to election 0.0172+ Reported violent crimes per 1000 inhabitants 0.0138**+ Unemployment 0.00283+ Proportion with post-secondary education -0.0187***+ Ln (Population in municipality)-0.0679*+ Number of electoral districts -0.00432 + Number of parties in local council 0.0285+ Grand coalition prior to election0.00493+ Mainstream party toughness on immigration 0.159 + Ln (SD votes in previous election) 0.393*** + Number of candidates for office*Candidates' level of qualification -1.056***</p>                                                                               |
| 33 | <p>Share of Seats for the SD in a Municipal Council after the 2006 Local Elections = Average unemployment prior to election 2006 -0.02 (0.16)+ Number of reported violent crimes in 2005 0.14*** (0.04) + Share of non-Nordic immigrants in 2006 0.17*** (0.05) + Share of male industrial workers 2002 0.04*** (0.01) + Percentage within the lowest income quartile 0.14*** (0.05) + Number of parties in council 2002-2006 0.96*** (0.16) + Number of electoral districts (fewer seats) -0.66** (0.29)</p>                                                                                                                                                                                                                                                                                                                                                                             |
| 33 | <p>Share of Seats for the SD in a Municipal Council after the 2006 Local Elections = Average unemployment prior to election 2006 -0.02 (0.13) + Number of reported violent crimes in 2005 0.11*** (0.03) + Share of non-Nordic immigrants in 2006 0.11*** (0.04) + Share of male industrial workers 2002 0.04*** (0.01) + Percentage within the lowest income quartile 0.13*** (0.05) + Number of parties in council 2002-2006 0.29** (0.13) + Number of electoral districts (fewer seats) -0.47** (0.23) + SD controlling the balance of power 2002 2.16*** (0.80) + Share of SD seats in 2002 1.23*** (0.14) + Minority government (2002-2006 0.69 (0.55) + Grand coalition 2002-2006 -0.15 (0.33)</p>                                                                                                                                                                                  |
| 33 | <p>Share of Seats for the SD in a Municipal Council after the 2006 Local Elections = Average unemployment prior to election 2006 -0.07 (0.13) + Number of reported violent crimes in 2005 0.11*** (0.03) + Share of non-Nordic immigrants in 2006 0.09** (0.04) + Share of male industrial workers 2002 0.04*** (0.01) + Percentage within the lowest income quartile 0.13*** (0.05) + Number of parties in council 2002-2006 0.36*** (0.13) + Number of electoral districts (fewer seats) -0.44** (0.23) + SD controlling the balance of power 2002 1.53 (0.94) + Share of SD seats in 2002 1.19*** (0.15)+ Minority government (2002-2006) -0.04 (0.61) + Grand coalition 2002-2006 -0.10 (0.34)) + SD controlling the balance of power in minority government 2002-2006 3.98*** (1.40) + SD potentially controlling the balance of power in grand coalition 2002-2006 -1.95 (1.32)</p> |
| 34 | <p>Radical right voting = Corr (economy, culture) 0.76 (5.25) + GDP increase -0.0003 (0.002) + Unemployment increase -1.45 (2.17)</p>                                                                                                                                                                                                                                                                                                                                                                                                                                                                                                                                                                                                                                                                                                                                                     |

|    |                                                                                                                                                      |
|----|------------------------------------------------------------------------------------------------------------------------------------------------------|
| 34 | Radical right voting = Corr (economy, culture) -8.06 (5.44) + Foreign born 0.14 (0.2) + Social spending 1.16 (0.48)                                  |
| 34 | Radical right voting = Corr (economy, culture) -2.1 (7.03) +Disproportionality 0.11 (0.21) + Effective N parties -0.18 (1.83)                        |
| 34 | Radical right voting = Corr (economy, culture) -1.02 (3.19) + Convergence right-left main parties -2.41 (6.48)                                       |
| 34 | Radical right voting = Corr (immigration, economy) -9.25 (7.64) + GDP increase 0.001 (0.002) + Unemployment increase 0.57 (2.03)                     |
| 34 | Radical right voting = Corr (immigration, economy) -8.04 (2.58)+ Foreign born 0.05 (0.12) + Social spending 0.73 (0.22)                              |
| 34 | Radical right voting = Corr (immigration, economy) -8.62 (4.49) +Disproportionality 0.13 (0.31) + Effective N parties -0.12 (0.65)                   |
| 34 | Radical right voting = Corr (immigration, economy) -8.15 (4.26) + Convergence right-left main parties -2.09 (8)                                      |
| 34 | Radical right voting = Corr (immigration, culture) 6.25 (2.74) + GDP increase -0.00003 (0.002) + Unemployment increase -1.1 (1.96)                   |
| 34 | Radical right voting = Corr (immigration, culture) 3.55 (5.04)+ Foreign born -0.22 (0.17) + Social spending 0.35 (0.39)                              |
| 34 | Radical right voting = Corr (immigration, culture) 6.51 (6.57) +Disproportionality -0.002 (0.42) + Effective N parties -0.02 (0.43)                  |
| 34 | Radical right voting = Corr (immigration, culture) 6.45 (3.32) + Convergence right-left main parties -0.63 (7.57)                                    |
| 34 | Radical right voting = Corr (economy, culture) -0.91 (3.48)                                                                                          |
| 34 | Radical right voting = Corr(economy, culture) -1.49 (6.82) + Effective threshold 0.03 (0.15)                                                         |
| 34 | Radical right voting = Corr (economy, culture) (0.12 (2.88) + Saliency economic dimension -2.44 (0.81) + Saliency cultural dimension -0.46 (0.5)     |
| 34 | Radical right voting = Corr (immigration, economy) -8.16 (3.64)                                                                                      |
| 34 | Radical right voting = Corr (immigration, economy) -8.47 (3.92) + Effective threshold 0.04 (0.08)                                                    |
| 34 | Radical right voting = Corr (immigration, economy) -8.55 (2.22) + Saliency economic dimension -2.56 (0.71) + Saliency cultural dimension 0.24 (0.55) |
| 34 | Radical right voting = Corr (immigration, culture) 6.52 (2.76)                                                                                       |
| 34 | Radical right voting = Corr (immigration, culture) 8.52 (8.95) + Effective threshold - 0.05 (0.12)                                                   |
| 34 | Radical right voting = Corr (immigration, culture) 12.08 (7.02) + Saliency economic dimension -3.07 (0.96) + Saliency cultural dimension -1.2 (0.42) |
| 34 | Radical Right Voting = Corr (economy, culture) -0.91 (2.95)                                                                                          |
| 34 | Radical Right Voting = Corr (economy, culture) 0.76 (3.22) + GDP increase -0.0003 (0.001)+ Unemployment increase -1.45 (1.26)                        |

|    |                                                                                                                                                                                                                                                         |
|----|---------------------------------------------------------------------------------------------------------------------------------------------------------------------------------------------------------------------------------------------------------|
| 34 | Radical Right Voting = Corr (economy, culture) -8.06 (4.37)+ Foreign born 0.13 (0.19) + Social spending 1.16 (0.4)                                                                                                                                      |
| 34 | Radical Right Voting = Corr (economy, culture) -1.83 (2.72) + Disproportionality 0.03 (1.14) + Effective N parties -0.48 (0.43)                                                                                                                         |
| 34 | Radical Right Voting = Corr (economy, culture) - 0.59 (2.84) + Effective threshold 0.007 (0.06)                                                                                                                                                         |
| 34 | Radical Right Voting = Corr (economy, culture) -0.38 (2.59) + Convergence 1.66 (5.91)                                                                                                                                                                   |
| 34 | Radical Right Voting = Corr (economy, culture) 0.89 (2.69) + Saliency economic dimension -1.01 (0.96) + Saliency cultural dimension -0.71 (0.68)                                                                                                        |
| 34 | Radical Right Voting = Corr (immigration, economy) -8.16 (2.89)                                                                                                                                                                                         |
| 34 | Radical Right Voting = Corr (immigration, economy) -9.25 (3.54) + GDP increase 0.001 (0.001) + Unemployment increase 0.57 (1.18)                                                                                                                        |
| 34 | Radical Right Voting = Corr (immigration, economy) -8.04 (2.52) + Foreign born 0.05 (0.1) + Social spending 0.73 (0.17)                                                                                                                                 |
| 34 | Radical Right Voting = Corr (immigration, economy) -8.62 (2.78) + Disproportionality 0.13 (0.13) + Effective N parties -0.12 (0.4)                                                                                                                      |
| 34 | Radical Right Voting = Corr (immigration, economy) - 8.47 (2.88)+ Effective threshold 0.04 (0.05)                                                                                                                                                       |
| 34 | Radical Right Voting = Corr (immigration, economy) -8.15 (2.88) + Convergence -2.09 (5.59)                                                                                                                                                              |
| 34 | Radical Right Voting = Corr (immigration, economy) -8.55 (2.45) + Saliency economic dimension -1.01 (0.96) + Saliency cultural dimension -0.71 (0.68)                                                                                                   |
| 34 | Radical Right Voting = Corr (immigration, culture) 6.52 (4.06)                                                                                                                                                                                          |
| 34 | Radical Right Voting = Corr (immigration, culture) 6.25 (3.89) + GDP increase -0.0004 (0.001) + Unemployment increase -1.1 (1.04)                                                                                                                       |
| 34 | Radical Right Voting = Corr (immigration, culture) 3.55 (3.43) + Foreign born -0.22 (0.1) + Social spending 0.35 (0.24)                                                                                                                                 |
| 34 | Radical Right Voting = Corr (immigration, culture) 0.35 (0.24) + Disproportionality -0.002 (0.16)+ Effective N parties -0.02 (0.47)                                                                                                                     |
| 34 | Radical Right Voting = Corr (immigration, culture) 8.52 (4.8) + Effective threshold -0.05 (0.07)                                                                                                                                                        |
| 34 | Radical Right Voting = Corr (immigration, culture) 6.45 (4.11) + Convergence -0.64 (6.37)                                                                                                                                                               |
| 34 | Radical Right Voting = Corr (immigration, culture) 12.08 (2.95) + Saliency economic dimension -3.07 (0.73) + Saliency cultural dimension -1.2 (0.49)                                                                                                    |
| 35 | Vote for Vlaams Blok 1987= Turkey Maghreb immigrants 0.106* + European immigrants 0.009 + Unemployment 0.044 + Per capita income 2.810*** + Crime 0.261 (significant at 0.10%.) + Social capital -0.251 + Urbanization -0.018 =====pseudo-R2= 0.489     |
| 35 | Vote for Vlaams Blok 1991 = Turkey Maghreb immigrants 0.181*** + European immigrants 0.059 ( significant at 0.10%) + Unemployment 0.218* + Per capita income 2.411*** + Crime 0.113 + Social capital -0.286* + Urbanization 0.018 =====pseudo-R2= 0.643 |

|    |                                                                                                                                                                                                                                                                                                                                                                                                                                                                                                                                                                          |
|----|--------------------------------------------------------------------------------------------------------------------------------------------------------------------------------------------------------------------------------------------------------------------------------------------------------------------------------------------------------------------------------------------------------------------------------------------------------------------------------------------------------------------------------------------------------------------------|
| 35 | Vote for Vlaams Blok 1995= Turkey Maghreb immigrants 0.121*** + European immigrants 0.056 (significant at 0.10%) + Unemployment 0.152 (significant at 0.10 %.)+ Per capita income (0.700) 0.995*** + Crime 0.081 + Social capital -0.228* + Urbanization 0.006 =====pseudo-R2= 0.550                                                                                                                                                                                                                                                                                     |
| 35 | Vote for Vlaams Blok 1999= Turkey Maghreb immigrants 0.098*** + European immigrants 0.016 + Unemployment 0.174* + Per capita income 0.918*** + Crime 0.108 + Social capital -0.203* + Urbanization 0.017 =====pseudo-R2= 0.517                                                                                                                                                                                                                                                                                                                                           |
| 35 | Vote for Vlaams Blok 2003= Turkey Maghreb immigrants 0.083*** + European immigrants -0.0001 + Unemployment 0.130 (significant at 0.10%.) + Per capita income 0.401( significant at 0.10%) + Crime 0.077 + Social capital -0.195* + Urbanization 0.012 =====pseudo-R2= 0.381                                                                                                                                                                                                                                                                                              |
| 35 | Vote for Vlaams Blok 2007 = Turkey Maghreb immigrants 0.071** + European immigrants 0.007 + Unemployment 0.315 *** + Per capita income.970***+ Crime 0.028 + Social capital -0.185* + Urbanization 0.007 =====pseudo-R2= 0.384                                                                                                                                                                                                                                                                                                                                           |
| 36 | Differences in voting results for the Sweden Democrats in the 2010 national election, across voting districts: 2010 general election Income - .018 (.001)+ Unemployment .134 (.034)+ Welfare -0.124 (.012)+ health .050(.004)                                                                                                                                                                                                                                                                                                                                            |
| 36 | Differences in voting results for the Sweden Democrats in the 2010 national election, across voting districts: 2010 general election = Immigration (1) .163 (.018) + Immigration (2) .130 (.025) + Immigration (3) -.017 (.005)=====Adjusted R2= .021 Standard error in parentheses                                                                                                                                                                                                                                                                                      |
| 36 | Differences in voting results for the Sweden Democrats in the 2010 national election, across voting districts: 2010 general election = Neighbour .003 (.003)=====Adjusted R2= .000 Standard error in parentheses                                                                                                                                                                                                                                                                                                                                                         |
| 36 | Differences in voting results for the Sweden Democrats in the 2010 national election, across voting districts: 2010 general election = Immigration( 1) .170 (.018) + Immigration( 2) .140 (.026) + Immigration( 3) -.012 (.006) + Neighbour -.007 (.004)=====Adjusted R2= .022                                                                                                                                                                                                                                                                                           |
| 36 | Differences in voting results for the Sweden Democrats in the 2010 national election, across voting districts: 2010 general election = Income - .022 (.001)+ Unemployment .149 (.033)+ Welfare .056 (.015)+ health .041 (.004)+ Immigration( 1) .047 (.017) + Immigration ( 2) .327 (.025) + Immigration( 3) -.169 (.009)+ Neighbour .031 (.004)===== Adjusted R2= .203 Standard error in parentheses                                                                                                                                                                    |
| 36 | Differences in voting results for the Sweden Democrats in the 2010 national election, across voting districts: 2010 general election = Income - .022 (.001)+ Unemployment .069 (.042)+ Welfare .026 (.016)+ health .041 (.004) + Immigration( 1) .259 (.33) + Immigration( 2).089 (.047) + Immigration( 3) -.191 (.013)+ Neighbour .028 (.007) + Unemployment*Immigration (1) -.034 (.005 + Unemployment*Immigration (2) .041 (.007)+ Unemployment*Immigration (3) .004 (.002) + Unemployment*Neighbour .001 (.001)===== Adjusted R2= .217 Standard error in parentheses |
| 36 | The halo effect in municipalities with a low proportion of immigrants (0-9.9 per cent) : 2010 general election = Neighbour .002 (.006)=====Adjusted R2= .000 Standard error in parentheses                                                                                                                                                                                                                                                                                                                                                                               |
| 36 | The halo effect in municipalities with a medium-sized proportion of immigrants (10-19.9 per cent): 2010 general election = Neighbour -.016 (.007)===== Adjusted R2 = .003                                                                                                                                                                                                                                                                                                                                                                                                |
| 36 | The halo effect in municipalities with a high proportion of immigrants (>20 per cent) : 2010 general election = Neighbour -.017 (.006)=====Adjusted R2= .007                                                                                                                                                                                                                                                                                                                                                                                                             |
| 36 | The halo effect in municipalities with a low proportion of immigrants (0-9.9 per cent) : 2010 general election = Income -.042 (.002)+ Unemployment -.108 (.051) + Welfare -.182 (.039) + Ill-health .012 (.008) + Neighbour .032 (.006) =====Adjusted R2= .138 Standard error in parentheses                                                                                                                                                                                                                                                                             |

|    |                                                                                                                                                                                                                                                                                                                                                                                                                                                                                     |
|----|-------------------------------------------------------------------------------------------------------------------------------------------------------------------------------------------------------------------------------------------------------------------------------------------------------------------------------------------------------------------------------------------------------------------------------------------------------------------------------------|
| 36 | The halo effect in municipalities with a medium-sized proportion of immigrants (10-19.9 per cent): 2010 general election = <b>Income</b> -.020 (.002) + <b>Unemployment</b> .336 (.062) + <b>Welfare</b> -.161 (.031) + <b>Ill-health</b> .074 (.008) + <b>Neighbour</b> .014 (.006) ===== Adjusted R2 = .293 Standard error in parentheses                                                                                                                                         |
| 36 | The halo effect in municipalities with a high proportion of immigrants (>20 per cent) : 2010 general election = <b>Income</b> .003 (.003) + <b>Unemployment</b> .263 (.066) + <b>Welfare</b> -.069 (.020) + <b>Ill-health</b> .055 (.009) + <b>Neighbour</b> -.014 (.006) =====Adjusted R2= .090 Standard error in parentheses                                                                                                                                                      |
| 36 | The halo effect in municipalities with a low proportion of immigrants (0-9.9 per cent) : 2010 general election = <b>Income</b> -.043 (.002)+ <b>Unemployment</b> .067 (.054) + <b>Welfare</b> -.178 (.039) + <b>Ill-health</b> .013 (.008)+ <b>Neighbour</b> .044 (.008) + Unemployment * Neighbour .002 (.001) =====Adjusted R2= .139 Standard error in parentheses                                                                                                                |
| 36 | The halo effect in municipalities with a medium-sized proportion of immigrants (10-19.9 per cent): 2010 general election = <b>Income</b> -.020 (.002) + <b>Unemployment</b> .317 (.074) + <b>Welfare</b> -.162 (.031) + <b>Ill-health</b> .075 (.008) + <b>Neighbour</b> .011 (.008) + Unemployment* Neighbour .001 (.001) ===== Adjusted R2 = .293 Standard error in parentheses                                                                                                   |
| 36 | The halo effect in municipalities with a high proportion of immigrants (>20 per cent) : 2010 general election = <b>Income</b> .003 (.003) + <b>Unemployment</b> .134 (.102) + <b>Welfare</b> -.071 (.020) + <b>Ill-health</b> .058 (.009) + <b>Neighbour</b> -.029 (.001) + + Unemployment*Neighbour .003 (.002)=====Adjusted R2= .091 Standard error in parentheses                                                                                                                |
| 36 | The halo effect in municipalities with a low proportion of immigrants (0-9.9 per cent) : 2010 general election = <b>Income</b> -.039 (.002) + <b>Unemployment</b> .017 (.053) + <b>Welfare</b> -.100 (.041)+ <b>Ill-health</b> -.017 (.008)+ <b>Neighbour</b> .027 (.008)+ Unemployment * Neighbour .000 (.001) + <b>Immigration (1)</b> .397 (.048) + <b>Immigration (2)</b> .663 (.057) + <b>Immigration (3)</b> -.142 (.042)=====Adjusted R2= .206 Standard error in parentheses |
| 36 | The halo effect in municipalities with a medium-sized proportion of immigrants (10-19.9 per cent): 2010 general election = <b>Income</b> -.021 (.002) + <b>Unemployment</b> .270 (.073) + <b>Welfare</b> -.021 (0.35)+ <b>Ill-health</b> (.066)(.008) + <b>Neighbour</b> .016 (.009 )+ Unemployment* Neighbour .003 (.001) + <b>Immigration (1)</b> .031 (.039) + <b>Immigration (2)</b> .187 (.049) + <b>Immigration (3)</b> -.193 (.029)===== Adjusted R2 =.003                   |
| 36 | The halo effect in municipalities with a high proportion of immigrants (>20 per cent) : 2010 general election = <b>Income</b> -.011 (.003) + <b>Unemployment</b> .396 (.096) + <b>Welfare</b> .050 (.020) + <b>Ill-health</b> .062 (.008) + <b>Neighbour</b> .039 (.012) + Unemployment*Neighbour .001 (.002)+ <b>Immigration (1)</b> -.110 (.025) + <b>Immigration (2)</b> .249 (.036) + <b>Immigration (3)</b> -.204 (.014)=====Adjusted R2= .275 Standard error in parentheses   |
| 37 | Differences in Voting for the Sweden Democrats in Local Elections across Municipalities in the 2006 Election: Local elections, 2006 = <b>GRP</b> -0.002 (0.002) + <b>Unemployment</b> 0.194 (0.187) + <b>Education</b> 0.014 (0.034) =====Adjusted R2= -0.003 Standard errors in parentheses.                                                                                                                                                                                       |
| 37 | Differences in Voting for the Sweden Democrats in Local Elections across Municipalities in the 2010 Election: Local elections, 2010 = <b>GRP</b> -0.003 (0.002) + <b>Unemployment</b> 0.756 (0.204) + <b>Education</b> -0.007 (0.037) Adjusted R2= 0.053 Standard errors in parentheses.                                                                                                                                                                                            |
| 37 | The Change in Electoral Support for the Sweden Democrats in Local Elections between 2006 and 2010: Local elections (lagged) = <b>GRP</b> 0.000 (0.001) + <b>Unemployment</b> -0.002 (0.127) + <b>Education</b> -0.058 (0.023) =====Adjusted R2 = 0.015 Standard errors in parentheses.                                                                                                                                                                                              |

|    |                                                                                                                                                                                                                                                                                                                                 |
|----|---------------------------------------------------------------------------------------------------------------------------------------------------------------------------------------------------------------------------------------------------------------------------------------------------------------------------------|
| 37 | Differences in Voting for the Sweden Democrats in the 2006 National Election across Municipalities: General election, 2006= <b>GRP -0.002 (0.001)</b> + <b>Unemployment -0.158 (0.108)</b> + <b>Education -0.058 (0.020)</b> =====Adjusted R2 = 0.043 Standard errors in parentheses.                                           |
| 37 | Differences in Voting for the Sweden Democrats in the 2010 National Election across Municipalities: General election, 2010 = <b>GRP -0.003 (0.001)</b> + <b>Unemployment 0.201 (0.152)</b> + <b>Education -0.112 (0.028)</b> =====Adjusted R2 = 0.095 Standard errors in parentheses.                                           |
| 37 | The Change in Electoral Support for the Sweden Democrats in the National Elections between 2006 and 2010: General elections (lagged) = <b>GRP -0.001 (0.001)</b> + <b>Unemployment 0.020 (0.069)</b> + <b>Education -0.070 (0.013)</b> =====Adjusted R2 0.118 Standard errors in parentheses.                                   |
| 37 | Differences in Voting for the Sweden Democrats in Local Elections across Municipalities in the 2006 Election: Local elections, 2006 = <b>Immigrants (total) 0.98 (0.034)</b> =====Adjusted R2= 0.025 Standard errors in parentheses.                                                                                            |
| 37 | Differences in Voting for the Sweden Democrats in Local Elections across Municipalities in the 2010 Election: Local elections, 2010 = <b>Immigrants (total) 0.152 (0.035)</b> =====Adjusted R2= 0.058 Standard errors in parentheses.                                                                                           |
| 37 | The Change in Electoral Support for the Sweden Democrats in Local Elections between 2006 and 2010: Local elections (lagged) = <b>Immigrants (total) 0.049 (0.022)</b> =====Adjusted R2 = 0.014 Standard errors in parentheses.                                                                                                  |
| 37 | Differences in Voting for the Sweden Democrats in the 2006 National Election across Municipalities: General election, 2006= <b>Immigrants (total) 0.044 (0.020)</b> =====Adjusted R2 = 0.013 Standard errors in parentheses.                                                                                                    |
| 37 | Differences in Voting for the Sweden Democrats in the 2010 National Election across Municipalities: General election, 2010 = <b>Immigrants (total) 0.056 (0.027)</b> =====Adjusted R2 = 0.011 Standard errors in parentheses.1 (0.152)+ Education -0.112                                                                        |
| 37 | The Change in Electoral Support for the Sweden Democrats in the National Elections between 2006 and 2010: General elections (lagged) = <b>Immigrants (total) 0.007 (0.013)</b> =====Adjusted R2 = -0.002 Standard errors in parentheses.                                                                                        |
| 37 | Differences in Voting for the Sweden Democrats in Local Elections across Municipalities in the 2006 Election: Local elections, 2006 = <b>Nordic immigrants -0.063 (0.053)</b> + <b>EU/EFTA immigrants 1.052 (0.232)</b> + <b>Non-European immigrants -0.006 (0.070)</b> =====Adjusted R2= 0.109 Standard errors in parentheses. |
| 37 | Differences in Voting for the Sweden Democrats in Local Elections across Municipalities in the 2010 Election: Local elections, 2010 = <b>Nordic immigrants -0.065 (0.058)</b> + <b>EU/EFTA immigrants 1.011 (0.189)</b> + <b>Non-European immigrants 0.070 (0.063)</b> ===== Adjusted R2= 0.162 Standard errors in parentheses. |
| 37 | The Change in Electoral Support for the Sweden Democrats in Local Elections between 2006 and 2010: Local elections (lagged) = <b>Nordic immigrants -0.015 (0.039)</b> + <b>EU/EFTA immigrants 0.183 (0.125)</b> + <b>Non-European immigrants 0.056 (0.041)</b> =====Adjusted R2 = 0.023Standard errors in parentheses.          |

|    |                                                                                                                                                                                                                                                                                                                                                                                                                                                                         |
|----|-------------------------------------------------------------------------------------------------------------------------------------------------------------------------------------------------------------------------------------------------------------------------------------------------------------------------------------------------------------------------------------------------------------------------------------------------------------------------|
| 37 | Differences in Voting for the Sweden Democrats in the 2006 National Election across Municipalities: General election, 2006= <b>Nordic immigrants -0.029 (0.031)+ EU/EFTA immigrants 0.930 (0.135)+ Non-European immigrants -0.115 (0.041)</b> =====Adjusted R2 = 0.152 Standard errors in parentheses.                                                                                                                                                                  |
| 37 | Differences in Voting for the Sweden Democrats in the 2010 National Election across Municipalities: <b>General election, 2010 =Nordic immigrants 0.006 (0.046)+ EU/EFTA immigrants 0.879 (0.149)+ Non-European immigrants -0.120 (0.049)</b> =====Adjusted R2 = 0.105 Standard errors in parentheses.                                                                                                                                                                   |
| 37 | The Change in Electoral Support for the Sweden Democrats in the National Elections between 2006 and 2010: General elections (lagged) = <b>Nordic immigrants 0.020 (0.022)+ EU/EFTA immigrants 0.100 (0.072)+ Non-European immigrants -0.024 (0.024)</b> =====Adjusted R2 =-0.001Standard errors in parentheses.                                                                                                                                                         |
| 37 | Differences in Voting for the Sweden Democrats in Local Elections across Municipalities in the 2006 Election: Local elections, 2006 = <b>GRP -0.004 (0.002)+ Unemployment 0.185 (0.184) + Education -0.111 (0.033) + Nordic immigrants -0.128 (0.050) + EU/EFTA immigrants 1.218 (0.244) + Non-European immigrants -0.107 (0.077) + Crime 0.032 (0.007)</b> =====Adjusted R2= 0.228 Standard errors in parentheses.                                                     |
| 37 | Differences in Voting for the Sweden Democrats in Local Elections across Municipalities in the 2010 Election: Local elections, 2010 = <b>GRP -0.005 (0.001) + Unemployment 0.329 (0.202)+ Education -0.153 (0.036) + Nordic immigrants -0.167 (0.054) + EU/EFTA immigrants 1.097 (0.178) + Non-European immigrants -0.004 (0.072) + Crime 0.031 (0.007)</b> =====Adjusted R2= 0.326 Standard errors in parentheses.                                                     |
| 37 | The Change in Electoral Support for the Sweden Democrats in Local Elections between 2006 and 2010: Local elections (lagged) = Local elections, 2010 = <b>GRP -0.001 (0.001) + Unemployment -0.225 (0.144) + Education -0.119 (0.025) + Nordic immigrants -0.045 (0.038) + EU/EFTA immigrants 0.189 (0.127)+ Non-European immigrants 0.134 (0.051) + Crime 0.003 (0.005)</b> =====Adjusted R2= 0.089 Standard errors in parentheses.                                     |
| 37 | Differences in Voting for the Sweden Democrats in the 2006 National Election across Municipalities: General election, 2006= Local elections, 2010 = <b>GRP -0.003 (0.001) + Unemployment -0.056 (0.099) + Education -0.145 (0.018) + Nordic immigrants -0.081 (0.027) + EU/EFTA immigrants 1.111 (0.131)+ Non-European immigrants -0.119 (0.041) + Crime 0.017 (0.004)</b> =====Adjusted R2= 0.367 Standard errors in parentheses.                                      |
| 37 | Differences in Voting for the Sweden Democrats in the 2010 National Election across Municipalities: General election, 2010 = Local elections, 2010 = <b>GRP -0.004 (0.001) + Unemployment -0.003 (0.153) + Education -0.196 (0.027) + Nordic immigrants -0.085 (0.041)+ EU/EFTA immigrants 0.930 (0.135)+ Non-European immigrants -0.121 (0.055) + Crime 0.025 (0.005)</b> =====Adjusted R2= 0.335 Standard errors in parentheses.                                      |
| 37 | The Change in Electoral Support for the Sweden Democrats in the National Elections between 2006 and 2010: General elections(lagged)= Local elections, 2010 = <b>GRP -0.001 (0.001) + Unemployment -0.103 (0.078) + Education -0.096 (0.014) + Nordic immigrants -0.015 (0.021) + EU/EFTA immigrants 0.110 (0.069)+ Non-European immigrants -0.003 (0.028) + Crime.009 (0.003)</b> =====Adjusted R2= 0.335 Standard errors in parentheses.                               |
| 37 | Differences in Voting for the Sweden Democrats in Local Elections across Municipalities in the 2006 Election: Local elections, 2006 = <b>GRP -0.004 (0.002) + Unemployment 0.205 (0.195) + Education -0.089 (0.037) + Nordic immigrants-0.133 (0.050) + EU/EFTA immigrants1.192 (0.245) + Non-European immigrants -0.085 (0.078) + Crime 0.035 (0.007) + S+V 0.004 (0.017) + Population size -0.005 (0.003)</b> =====Adjusted R2= 0.229 Standard errors in parentheses. |
| 37 | Differences in Voting for the Sweden Democrats in Local Elections across Municipalities in the 2010 Election = <b>GRP-0.004 (0.001) + Unemployment 0.523 (0.212) + Education -0.164 (0.040) + Nordic immigrants -0.159 (0.054)+ EU/EFTA immigrants0.953 (0.183) + Non-European immigrants 0.007 (0.072)) + Crime 0.035 (0.007) + S+V -0.046 (0.018)+ Population size -0.005 (0.003))</b> =====Adjusted R2= 0.341 Standard errors in parentheses.                        |

|    |                                                                                                                                                                                                                                                                                                                                                                                                                                                                                                                                                                                                                                          |
|----|------------------------------------------------------------------------------------------------------------------------------------------------------------------------------------------------------------------------------------------------------------------------------------------------------------------------------------------------------------------------------------------------------------------------------------------------------------------------------------------------------------------------------------------------------------------------------------------------------------------------------------------|
| 37 | <b>The Change in Electoral Support for the Sweden Democrats in Local Elections between 2006 and 2010 : Local elections (lagged) = GRP -0.001 (0.001) + Unemployment -0.123 (0.152) + Education -0.135 (0.029) + Nordic immigrants -0.038 (0.038) + EU/EFTA immigrants 0.120 (0.131) + Non-European immigrants 0.132 (0.052) + Crime 0.004 (0.005) + S+V -0.026 (0.013) + Population size 0.000 (0.002) =====Adjusted R2= 0.096 Standard errors in parentheses.</b>                                                                                                                                                                       |
| 37 | <b>Differences in Voting for the Sweden Democrats in the 2006 National Election across Municipalities: General election, 2006= GRP -0.002 (0.001) + Unemployment 0.055 (0.115) + Education -0.152 (0.022) + Nordic immigrants -0.079 (0.027) + EU/EFTA immigrants 1.069 (0.132) + Non-European immigrants -0.108 (0.042) + Crime 0.017 (0.004) + S+V -0.019 (0.012) + Population size -0.003 (0.002) =====Adjusted R2= 0.374 Standard errors in parentheses.</b>                                                                                                                                                                         |
| 37 | <b>Differences in Voting for the Sweden Democrats in the 2010 National Election across Municipalities: General election, 2010 = GRP -0.001 (0.001) + Unemployment 0.467 (0.162) + Education -0.260 (0.030) + Nordic immigrants -0.053 (0.039) + EU/EFTA immigrants 0.662 (0.134) + Non-European immigrants -0.142 (0.052) + Crime 0.025 (0.005) + S+V -0.094 (0.015) + Population size -0.003 (0.002) =====Adjusted R2= 0.414 Standard errors in parentheses.</b>                                                                                                                                                                        |
| 37 | <b>The Change in Electoral Support for the Sweden Democrats in the National Elections between 2006 and 2010 : General elections (lagged) = GRP 0.000 (0.001) + Unemployment 0.078 (0.085) + Education -0.123 (0.016) + Nordic immigrants -0.002 (0.020) + EU/EFTA immigrants 0.009 (0.070) + Non-European immigrants -0.013 (0.028) + Crime 0.009 (0.003) + S+V -0.037 (0.008) + Population size -0.001 (0.001) =====Adjusted R2= 0.231 Standard errors in parentheses.</b>                                                                                                                                                              |
| 37 | <b>Differences in Voting for the Sweden Democrats in Local Elections across Municipalities in the 2006 Election: Local elections, 2006 = GRP -0.004 (0.002) + Unemployment -0.408 (0.385) + Education -0.068 (0.041) + Nordic immigrants -0.290 (0.173) + EU/EFTA immigrants 0.046 (0.872) + Non-European immigrants -0.049 (0.265) + Crime 0.035 (0.007) + S+V 0.005 (0.017) + Population size -0.007 (0.003) + Unemployment *Nordic immigrants 0.038 (0.037) + Unemployment * EU/EFTA immigrants 0.349 (0.251) + Unemployment *Non-European immigrants -0.021 (0.071) =====Adjusted R2= 0.231 Standard errors in parentheses. K131</b> |
| 37 | <b>Differences in Voting for the Sweden Democrats in Local Elections across Municipalities in the 2010 Election = GRP -0.003 (0.001) + Unemployment -0.411 (0.397) + Education -0.122 (0.045) + Nordic immigrants -0.404 (0.268) + EU/EFTA immigrants -0.315 (0.751) + Non-European immigrants -0.133 (0.233) + Crime 0.035 (0.007) + S+V -0.044 (0.018) + Population size -0.006 (0.003) + Unemployment *Nordic immigrants 0.056 (0.056) + Unemployment * EU/EFTA immigrants 0.328 (0.185) + Unemployment *Non-European immigrants 0.016 (0.052) =====Adjusted R2= 0.353 Standard errors in parentheses.</b>                            |
| 37 | <b>The Change in Electoral Support for the Sweden Democrats in Local Elections between 2006 and 2010 : Local elections (lagged) = GRP -0.001 (0.001) + Unemployment 0.116 (0.288) + Education -0.146 (0.033) + Nordic immigrants -0.043 (0.194) + EU/EFTA immigrants 0.221 (0.545) + Non-European immigrants 0.296 (0.169) + Crime 0.005 (0.005) + S+V -0.028 (0.013) + Population size 0.000 (0.040) + Unemployment *Nordic immigrants 0.000 (0.040) + Unemployment * EU/EFTA immigrants -0.029 (0.134) + Unemployment *Non-European immigrants -0.035 (0.038) =====Adjusted 0.095 Standard errors in parentheses.</b>                  |
| 37 | <b>Differences in Voting for the Sweden Democrats in the 2006 National Election across Municipalities: General election, 2006= GRP -0.002 (0.001) + Unemployment -0.338 (0.213) + Education -0.133 (0.024) + Nordic immigrants -0.163 (0.092) + EU/EFTA immigrants 0.132 (0.466) + Non-European immigrants -0.014 (0.142) + Crime 0.018 (0.004) + S+V -0.018 (0.012) + Population size -0.004 (0.002) + Unemployment *Nordic immigrants 0.021 (0.020) + Unemployment * EU/EFTA immigrants 0.284 (0.134) + Unemployment *Non-European immigrants -0.034 (0.038) =====Adjusted 0.381 Standard errors in parentheses.</b>                   |

|    |                                                                                                                                                                                                                                                                                                                                                                                                                                                                                                                                                                                                                                        |
|----|----------------------------------------------------------------------------------------------------------------------------------------------------------------------------------------------------------------------------------------------------------------------------------------------------------------------------------------------------------------------------------------------------------------------------------------------------------------------------------------------------------------------------------------------------------------------------------------------------------------------------------------|
| 37 | <b>Differences in Voting for the Sweden Democrats in the 2010 National Election across Municipalities: General election, 2010 = GRP -0.001 (0.001) + Unemployment -0.027 (0.292) + Education -0.229 (0.034) + Nordic immigrants -0.171 (0.193) + EU/EFTA immigrants -0.612 (0.541) + Non-European immigrants 0.028 (0.168) + Crime 0.025 (0.005) + S+V -0.096 (0.015) + Population size -0.004 (0.002) + Unemployment * Nordic immigrants 0.028 (0.040) + Unemployment * EU/EFTA immigrants 0.325 (0.133) + Unemployment * Non-European immigrants -0.048 (0.038) ===== Adjusted 0.422 Standard errors in parentheses.</b>             |
| 37 | <b>The Change in Electoral Support for the Sweden Democrats in the National Elections between 2006 and 2010 = General elections (lagged) GRP 0.000 (0.001) + Unemployment 0.054 (0.155) + Education -0.116 (0.018) + Nordic immigrants 0.041 (0.103) + EU/EFTA immigrants -0.298 (0.287) + Non-European immigrants 0.061 (0.089) + Crime 0.008 (0.003) + S+V -0.037 (0.008) + Population size -0.001 (0.001) + Unemployment * Nordic immigrants -0.008 (0.021) + Unemployment * EU/EFTA immigrants 0.078 (0.071) + Unemployment * Non-European immigrants -0.019 (0.020) ===== Adjusted R2 = 0.227 Standard errors in parentheses.</b> |
| 37 | <b>Differences in Voting for the Sweden Democrats in Local Elections across Municipalities in the 2006 Election: Local elections, 2006 = GRP -0.004 (0.002) + Unemployment 0.208 (0.202) + Education -0.087 (0.038) + Nordic immigrants 0.024 (0.211) + EU/EFTA migrants 0.481 (0.783) + Non-European immigrants 0.152 (0.254) + Crime 0.037 (0.012) + S+V 0.003 (0.017) + Population size -0.005 (0.004) + Crime * Nordic immigrants -0.002 (0.002) + Crime * EU/EFTA immigrants 0.007 (0.007) + Crime * Non-European immigrants -0.002 (0.002) ===== Adjusted R2= 0.226</b>                                                          |
| 37 | <b>Differences in Voting for the Sweden Democrats in Local Elections across Municipalities in the 2010 Election = GRP -0.004 (0.001) + Unemployment 0.494 (0.214) + Education -0.169 (0.040) + Nordic immigrants 0.088 (0.265) + EU/EFTA immigrants 0.023 (0.627) + Non-European immigrants 0.373 (0.234) + Crime 0.038 (0.013) + S+V -0.046 (0.018) + Population size -0.004 (0.004) + Crime * Nordic immigrants -0.002 (0.002) + Crime * EU/EFTA immigrants 0.008 (0.005) + Crime * Non-European immigrants -0.003 (0.002) ===== Adjusted R2= 0.345</b>                                                                              |
| 37 | <b>The Change in Electoral Support for the Sweden Democrats in Local Elections between 2006 and 2010 : Local elections (lagged) = GRP -0.001 (0.001) + Unemployment -0.130 (0.155) + Education -0.140 (0.029) + Nordic immigrants 0.050 (0.191) + EU/EFTA immigrants 0.397 (0.452) + Non-European immigrants 0.157 (0.169) + Crime 0.013 (0.009) + S+V -0.026 (0.013) + Population size 0.000 (0.003) + Crime * Nordic immigrants -0.001 (0.002) + Crime * EU/EFTA immigrants -0.002 (0.004) + Crime * Non-European immigrants 0.000 (0.001) ===== Adjusted R2= 0.090</b>                                                              |
| 37 | <b>Differences in Voting for the Sweden Democrats in the 2006 National Election across Municipalities: General election, 2006= GRP -0.002 (0.001) + Unemployment 0.111 (0.117) + Education -0.157 (0.022) + Nordic immigrants 0.017 (0.112) + EU/EFTA immigrants 0.546 (0.416) + Non-European immigrants 0.244 (0.135) + Crime 0.023 (0.006) + S+V -0.023 (0.012) + Population size -0.001 (0.001) + Crime * Nordic immigrants -0.001 (0.001) + Crime * EU/EFTA immigrants 0.005 (0.004) + Crime * Non-European immigrants -0.003 (0.001) ===== Adjusted R2= 0.388</b>                                                                 |
| 37 | <b>Differences in Voting for the Sweden Democrats in the 2010 National Election across Municipalities: General election, 2010 = GRP -0.001 (0.001) + Unemployment 0.441 (0.161) + Education -0.268 (0.030) + Nordic immigrants 0.237 (0.189) + EU/EFTA immigrants -0.145 (0.450) + Non-European immigrants 0.198 (0.167) + Crime 0.031 (0.009) + S+V -0.096 (0.015) + Population size -0.002 (0.003) + Crime * Nordic immigrants -0.003 (0.002) + Crime * EU/EFTA immigrants 0.007 (0.004) + Crime * Non-European immigrants -0.003 (0.001) ===== Adjusted R2= 0.425</b>                                                               |
| 37 | <b>The Change in Electoral Support for the Sweden Democrats in the National Elections between 2006 and 2010 = GRP 0.000 (0.001) + Unemployment 0.064 (0.086) + Education -0.128 (0.016) + Nordic immigrants 0.127 (0.101) + EU/EFTA immigrants 0.083 (0.239) + Non-European immigrants 0.022 (0.089) + Crime 0.015 (0.005) + S+V -0.037 (0.008) + Population size 0.000 (0.001) + Crime * Nordic immigrants -0.001 (0.001) + Crime * EU/EFTA immigrants -0.001 (0.002) + Crime * Non-European immigrants 0.000 (0.001) ===== Adjusted R2= 0.231</b>                                                                                    |
| 37 | <b>Differences in Voting for the Sweden Democrats in Local Elections across Municipalities in the 2006 Election: Local elections, 2006 = Crime 0.034 (0.005) ===== Adjusted R2= 0.119 Standard errors in parentheses.</b>                                                                                                                                                                                                                                                                                                                                                                                                              |

|    |                                                                                                                                                                                                                                                                                                                                                                                                                                          |
|----|------------------------------------------------------------------------------------------------------------------------------------------------------------------------------------------------------------------------------------------------------------------------------------------------------------------------------------------------------------------------------------------------------------------------------------------|
| 37 | Differences in Voting for the Sweden Democrats in Local Elections across Municipalities in the 2010 Election: Local elections, 2010 = <b>Crime 0.038 (0.006)</b> =====Adjusted R2= 0.136 Standard errors in parentheses.                                                                                                                                                                                                                 |
| 37 | The Change in Electoral Support for the Sweden Democrats in Local Elections between 2006 and 2010: Local elections (lagged) = <b>Crime 0.007 (0.004)</b> =====Adjusted R2 = 0.008 Standard errors in parentheses.                                                                                                                                                                                                                        |
| 37 | Differences in Voting for the Sweden Democrats in the 2006 National Election across Municipalities: General election, 2006= <b>Crime 0.014 (0.003)</b> =====Adjusted R2 = 0.058 Standard errors in parentheses.                                                                                                                                                                                                                          |
| 37 | Differences in Voting for the Sweden Democrats in the 2010 National Election across Municipalities: General election, 2010 = <b>Crime 0.019 (0.004)</b> =====Adjusted R2 = 0.054 Standard errors in parentheses.1 (0.152)                                                                                                                                                                                                                |
| 37 | The Change in Electoral Support for the Sweden Democrats in the National Elections between 2006 and 2010: General elections (lagged) = <b>Crime 0.004 (0.002)</b> =====Adjusted R2 = 0.011 Standard errors in parentheses.                                                                                                                                                                                                               |
| 38 | Influence of demonization on electoral support for Groep Wilders (subsequently Groep Wilders-PVV) between September 2004 and November 2006 = <b>Autocorrelation (t-12) (-0.38)*** + Party is demonised (t-1) (-26.10)** + Party is demonised (t-2)(-28.54)***</b>                                                                                                                                                                        |
| 38 | Influence of demonization on electoral support for Groep Wilders (subsequently Groep Wilders-PVV) between November 2006 and June 2010 = <b>Party is demonised (t-1) (1.95) + Party is demonised (t-2)(0.54)</b>                                                                                                                                                                                                                          |
| 38 | Influence of demonization on electoral support for Groep Wilders (subsequently Groep Wilders-PVV) between september 2010 and December 2011 = <b>Party is demonised (t-1) (-5.43) + Party is demonised (t-2)(-2.36)</b>                                                                                                                                                                                                                   |
| 39 | The vote share of all populist right parties = <b>Crime 2.14** + Immigration 1.21** + Unemployment -0.13 + “Effective” Number of Parties 1.59** + “Effective” Threshold 0.03</b> =====Log likelihood =-211.13                                                                                                                                                                                                                            |
| 39 | The vote share of all populist right parties = <b>Crime 1.48** + Immigration 0.05 + Unemployment -0.13 + “Effective” Number of Parties 1.84** + “Effective” Threshold 0.03 + Crime*immigration 0.15*</b> =====Log likelihood =-209.01                                                                                                                                                                                                    |
| 39 | The vote share of all populist right parties = <b>Crime 1.50** + Immigration 0.74* + Unemployment -0.42* + “Effective” Number of Parties 2.07** + “Effective” Threshold -0.08 + Electoral support (lagged) 0.41*</b> =====Log likelihood =-211.13                                                                                                                                                                                        |
| 40 | The sum of all ERPs’ vote shares in a given election = <b>Disproportionality 0.389* (0.182) + Federalism 2.269 (1.247) + Unemployment -0.004 (0.174) + Foreign-born population 0.728** (0.203)</b> =====Log pseudo-likelihood = 7262.066                                                                                                                                                                                                 |
| 40 | The sum of all ERPs’ vote shares in a given election= <b>Disproportionality 0.311 (0.182) + Federalism 1.812 (1.286) + Unemployment -0.071 (0.168) + Foreign-born population 0.507* (0.226) + General left–right scale : Convergence 3.407* (1.367) + General left–right scale : Position mainstream right 2.693* (1.154) + General left–right scale: Party system polarisation 1.463* (0.728)</b> =====Log pseudo-likelihood = 7257.041 |
| 40 | The sum of all ERPs’ vote shares in a given election= <b>Disproportionality 0.391* (0.184) + Federalism 2.566 (1.314) + Unemployment -0.032 (0.177) + Foreign-born population 0.685** (0.208) + Economic scale : Convergence -0.014 (1.064) + Economic scale : Position main-stream right 1.191 (0.897) + Economic scale : Party system polarisation -0.529 (0.463)</b> =====Log pseudo-likelihood = 7260.006                            |

|    |                                                                                                                                                                                                                                                                                                                                                                                                                                                                                                                                                                                                                                                                                                                             |
|----|-----------------------------------------------------------------------------------------------------------------------------------------------------------------------------------------------------------------------------------------------------------------------------------------------------------------------------------------------------------------------------------------------------------------------------------------------------------------------------------------------------------------------------------------------------------------------------------------------------------------------------------------------------------------------------------------------------------------------------|
| 40 | The sum of all ERPs' vote shares in a given election= <b>Disproportionality 0.260 (0.169) + Federalism 0.645 (1.180) + Unemployment 0.0250 (0.158) + Foreign-born population 0.696** (0.203)+ Non-economic scale : Convergence 2.725** (0.762) + Non-economic scale : Position mainstream right .724 (0.665) + Non-economic scale : Party system polarisation 2.544** (0.590)</b> ===== Log pseudo-likelihood =7251.097                                                                                                                                                                                                                                                                                                     |
| 40 | The sum of all ERPs' vote shares in a given election= <b>Disproportionality 0.225 (0.168) + Federalism 0.996 (1.200) + Unemployment -0.017 (0.157) + Foreign-born population 0.623** (0.195) + Economic scale : Convergence 0.395 (0.995) + Economic scale : Position main-stream right 1.817* (0.830) + Economic scale : Party system polarisation -0.755 (0.432) + Non-economic scale : Convergence 2.651** (0.750) + Non-economic scale : Position mainstream .673 (0.658) + Non-economic scale : Party system polarisation 2.766** (0.571)</b> =====Log pseudo-likelihood= 7246.517                                                                                                                                     |
| 40 | The sum of all ERPs' vote shares in a given election= <b>Disproportionality 0.219 (0.164) + Federalism 1.323 (1.185) + Unemployment -0.182 (0.173) + Foreign-born population 0.356 (0.232) + Economic scale : Convergence 0.661 (0.984) + Economic scale : Position main-stream right 2.12* (0.828) + Economic scale : Party system polarisation -0.683 (0.424) + Non-economic scale : Convergence 2.728** (0.737) + Non-economic scale : Position mainstream 0.616 (0.644) + Non-economic scale : Party system polarisation 2.851** (0.560) + Interaction effects of both part scales Unemployment* foreign-born pop -0.092* (0.045)</b> =====Log pseudo-likelihood = 7244.477                                             |
| 40 | The sum of all ERPs' vote shares in a given election= <b>Disproportionality 0.171 (0.164) + Federalism 1.246 (1.168) + Unemployment -0.077 (0.155) + Foreign-born population 0.628** (0.189) +Economic scale : Convergence 0.935 (0.988) + Economic scale : Position main-stream right 1.754* (0.807) + Economic scale : Party system polarisation -0.146 (0.478) + Non-economic scale : Convergence 2.882** (0.739) + Non-economic scale : Position mainstream .267 (0.657) + Non-economic scale : Party system polarisation 3.453** (0.614) + Interaction effects of both part scales : Convergence 70.539** (0.203)</b> =====Log pseudo-likelihood 7242.996                                                              |
| 40 | The sum of all ERPs' vote shares in a given election= <b>Disproportionality 0.242 (0.170) + Federalism 1.019 (1.199) +Unemployment -0.021 (0.157) + Foreign-born population ) 0.645** (0.199) + Economic scale : Convergence 0.525 (1.022) + Economic scale : Position main-stream right 1.918* (0.850) + Economic scale : Party system polarisation -0.760 (0.432) + Non-economic scale : Convergence 2.612** (0.752) + Non-economic scale : Position mainstream .717 (0.664) + Non-economic scale : Party system polarisation 2.744** (0.571) + Interaction effects of both part scales :Position mainstream right 0.151 (0.275)</b> =====Log pseudo-likelihood 7246.367                                                  |
| 40 | The sum of all ERPs' vote shares in a given election= <b>Disproportionality 0.102 (0.169) + Federalism 1.041 (1.167) + Unemployment -0.088 (0.155) + Foreign-born population 0.644** (0.189) + Economic scale : Convergence 1.307 (1.032) + Economic scale : Position main-stream right 2.243** (0.824) + Economic scale : Party system polarisation 70.200 (0.473) + Non-economic scale : Convergence 2.910** (0.740) + Non-economic scale : Position mainstream .319 (0.654) + Non-economic scale : Party system polarisation 3.527** (0.632)+ Interaction effects of both part scales : Party system polarisation -0.285* (0.112)</b> ===== Log pseudo-likelihood = 3.008 (0.219)                                        |
| 41 | <b>SVP vote share = Vote share of the Christian democratic party -0.54*** + Vote share of the free democratic party -0.66*** + No. of foreigners -0.07* + Unemployment -2.47*** + Population density -0.0009** + No. of citizens without post-secondary education 0.29*** + No. of individuals age 64 and over -0.21***</b>                                                                                                                                                                                                                                                                                                                                                                                                 |
| 42 | The electoral success of radical right-wing populist parties (1981–98) (Baseline model) = <b>Trade openness (merchandise tradet1) -0.0040 (0.0062) + Capital mobility (liberalizationt1) 0.1221 (0.3035) + Foreign immigration (asylum seekers mean (t-1 to t-3)) 0.5206** (0.1622) + Social welfare protection -1.7633** (0.4566) + De-industrialization (manufacturing jobs t-1) -0.0571 (0.0492) + Economic growth rate (t-1) 0.1481 (0.1055) + Proportional representation 0.5982* (0.4382) + Left libertarian party vote (e-1) 0.1200** (0.0508) + Established right party vote—long-term share -0.0117 (0.0156) + Tax burdens (t-1) 0.1757** (0.0489) + RRWP vote (e-1) 0.2206** (0.0446)</b> =====Pseudo R2 = 0.8351 |

|    |                                                                                                                                                                                                                                                                                                                                                                                                                                                                                                                                                                                                                                                                                                                                                                                                                                                                                                                                                                          |
|----|--------------------------------------------------------------------------------------------------------------------------------------------------------------------------------------------------------------------------------------------------------------------------------------------------------------------------------------------------------------------------------------------------------------------------------------------------------------------------------------------------------------------------------------------------------------------------------------------------------------------------------------------------------------------------------------------------------------------------------------------------------------------------------------------------------------------------------------------------------------------------------------------------------------------------------------------------------------------------|
| 42 | <p>The electoral success of radical right-wing populist parties (1981–98) ( Trade openness*social protection)= <b>Trade openness (merchandise tradet1) 0.0021 (0.0066) + Capital mobility (liberalizationt1) 0.3309 (0.3130) + Foreign immigration (asylum seekers mean (t-1 to t-3)) 0.4199** (0.1628) + Social welfare protection 1.1102 (1.0693) + Trade openness*social protection -0.0641** (0.0216) + De-industrialization (manufacturing jobst1) -0.1159** (0.0546) + Economic growth rate (t-1) 0.0927 (0.1026) + Proportional representation 0.7478** + Left libertarian party vote (e-1) 0.1162** (0.0510) + Established right party vote—long-term share -0.0309** (0.0166) + Tax burdens (t-1) 0.1995** (0.0482) + RRWP vote(e-1) 0.1919** (0.0462) =====Pseudo R2 = 0.8715</b></p>                                                                                                                                                                          |
| 42 | <p>The electoral success of radical right-wing populist parties (1981–98)(Capital mobility*social protection)= <b>Trade openness (merchandise tradet1) -0.0056 (0.0063) + Capital mobility (liberalizationt1) 0.3320 (0.3524)+ Foreign immigration (asylum seekers mean (t-1 to t-3)) 0.5576** (0.1634) + Social welfare protection 1.2536 (1.6203) + Capital mobility*social protection 0.9508** (0.4910) + De-industrialization (manufacturing jobs t-1) -0.0846* (0.0519) + Economic growth rate (t-1) 0.1420 (0.1036) + Proportional representation 0.9404** (0.4722) + Left libertarian party vote (e-1) 0.1169** (0.0509) + Established right party vote—long-term share -0.0180 (0.0165) + Tax burdens (t-1) 0.1882** (0.0516) + RRWP vote (e-1) 0.2173** (0.0451) =====Pseudo R2 = 0.8509</b></p>                                                                                                                                                                |
| 42 | <p>The electoral success of radical right-wing populist parties (1981–98)( Foreign immigration*social protection)= <b>Trade openness (merchandise tradet1) -0.0056 (0.0063) + Capital mobility (liberalizationt1) 0.0612 (0.3091) + Foreign immigration (asylum seekers mean (t-1 to t-3)) 0.6665** (0.1907) + Social welfare protection -1.5825** (0.4764) + Foreigners*social protection -0.1733* (0.1184) + De-industrialization (manufacturing jobs t-1) -0.0690* (0.0501) + Economic growth rate (t-1) 0.1259 (0.1193) + Proportional representation 0.5900* (0.4088) + Left libertarian party vote (e-1) 0.0991** (0.0527) + Established right party vote—long-term share 0.0166 (0.0159) + Tax burdens (t-1) 0.1839** (0.0500) + RRWP vote (e-1) 0.2244** (0.0450) =====Pseudo R2 = 0.8474</b></p>                                                                                                                                                                |
| 42 | <p><b>Tobit coefficient (asymptotic standard error) Trade openness (merchandise trade t-1) 0.0049 (0.0072) + Capital mobility (liberalization t-1) 0.4368 (0.3982) + Foreign immigration (asylum seekers mean (t-1 to t-3)) 0.4186** (0.1902) + Social welfare protection 1.4500 (1.4390) + Trade openness*social protection -0.0860** (0.0296) + Capital mobility*social protection -0.7097* (0.5236) + Foreign immigration *social protection -0.2159** (0.1278) + De-industrialization (manufacturing jobs t-1) -0.2371** (0.0672) + Economic growth rate(t-1) 0.2704* (0.1464) + Proportional representation 2.2660** (1.1848) + Left libertarian party vote (e-1) 0.0174 (0.0617) + Established right party vote—long-term share -0.0049 (0.0238) + Tax burdens (t-1) 0.2453** (0.0604) + RRWP vote (e-1) 0.1995* (0.0567) =====Pseudo R2= 0.8534</b></p>                                                                                                           |
| 42 | <p><b>The electoral success of radical right-wing populist parties Mediterranean nations excluded) = Tobit coefficient (asymptotic standard error) Trade openness (merchandise trade t-1) 0.0010 (0.0070) + Capital mobility (liberalization t-1) 0.2282 (0.3303) + Foreign immigration (asylum seekers mean (t-1 to t-3)) 0.3954** (0.1692) + Social welfare protection 1.0954 (1.1486) + Trade openness*social protection -0.0629** (0.0224) + Capital mobility*social protection -0.8568** (0.5014) 0.5342 + Foreign immigration *social protection -0.1652* (0.1185) + De-industrialization (manufacturing jobs t-1) -0.1272** (0.0571) + Economic growth rate (t-1) 0.0710 (0.1050) + Proportional representation 0.8189** (0.4512) + Left libertarian party vote (e-1) 0.1058** (0.0820) + Established right party vote—long-term share -0.0285* (0.0177) + Tax burdens (t-1) 0.1833** (0.0529) + RRWP vote (e-1) 0.1940** (0.0462) =====Pseudo R2= 0.8592</b></p> |
| 42 | <p><b>The electoral success of radical right-wing populist parties ('Conservative' politics excluded)= Tobit coefficient (asymptotic standard error) Trade openness (merchandise trade t-1) -0.0032 (0.01320) + Capital mobility (liberalization t-1) 0.2834 (0.3898) + Foreign immigration (asylum seekers mean (t-1 to t-3)) 0.7102** (0.2753) + Social welfare protection -0.4468 (0.2016) + Trade openness*social protection -0.0690** (0.0310) + Capital mobility*social protection -0.5342 (0.5598) + Foreign immigration *social protection -0.1814 (0.2031) + De-industrialization (manufacturing jobs t-1) -0.1640** (0.0898) + Economic growth rate (t-1) 0.2507 (0.1839) + Proportional representation 0.9952* (0.7028) + Left libertarian party vote (e-1) 0.0046 (0.0820) + Established right party vote—long-term share -0.0845** (0.0367) + Tax burdens (t-1) 0.3491** (0.1037) + RRWP vote (e-1) 0.3017** (0.0870) =====Pseudo R2= 0.7956</b></p>        |

|    |                                                                                                                                                                                                                                                                                                                                                                                                                                                                                                                                                                                                                                                                                                                                                                                                                                                                                                                                                                   |
|----|-------------------------------------------------------------------------------------------------------------------------------------------------------------------------------------------------------------------------------------------------------------------------------------------------------------------------------------------------------------------------------------------------------------------------------------------------------------------------------------------------------------------------------------------------------------------------------------------------------------------------------------------------------------------------------------------------------------------------------------------------------------------------------------------------------------------------------------------------------------------------------------------------------------------------------------------------------------------|
| 42 | <p>The electoral success of radical right-wing populist parties ('Universalist' systems excluded)= Tobit coefficient (asymptotic standard error) Trade openness (merchandise trade t-1) 0.0004 (0.0107) + Capital mobility (liberalization t-1) 1.2951** (0.7601) + Foreign immigration (asylum seekers mean (t-1 to t-3)) 0.2649 (0.2396) + Social welfare protection 3.0576* (1.7716) + Trade openness*social protection -0.0966** (0.0346) + Capital mobility*social protection -2.9709** (1.0044) + Foreign immigration *social protection -0.7811** (0.4823) + De-industrialization (manufacturing jobs t-1) -0.0187 (0.0801) + Economic growth rate (t-1) 0.1194 (0.1500) + Proportional representation 0.5810 (0.5322) + Left libertarian party vote (e-1) 0.2474** (0.0896) + Established right party vote—long-term share -0.0632** (0.0266) + Tax burdens (t-1) 0.2608** (0.0795) + RRWP vote (e-1) 0.2078** (0.0726)</p> <p>=====Pseudo R2= 0.9368</p> |
| 43 | <p>Tests of Existing Explanations of Anti-Immigrant Party Support : electoral potential = Lack of support for democracy 0.12(0.11) + Number of asylum applications 9.19 (27.59) + Change in unemployment (in 1 year) 0.03 (2.05) + Change in inflation (in 1 year) 0.69( 2.13) + Economic growth (in 1 year) - 1.48 (2.05) ===== Adjusted R2= -0.066</p>                                                                                                                                                                                                                                                                                                                                                                                                                                                                                                                                                                                                          |
| 43 | <p>Tests of Existing Explanations of Anti-Immigrant Party Support : electoral potential = Lack of support for democracy 0.026 (0.12)* + Number of asylum applications 7.93 (24.67) + Relative unemployment -1.25(0.64) + Relative inflation -1.69(0.42)** + Relative economic growth -3.10 (1.11)**=====Adjusted R2 = 0.156</p>                                                                                                                                                                                                                                                                                                                                                                                                                                                                                                                                                                                                                                   |
| 43 | <p>Tests of Existing Explanations of Anti-Immigrant Party Support: electoral success = Lack of support for democracy 0.06 (0.06) + Number of asylum applications 2.33 (14.87)+ Change in unemployment ( in 1 year) -1.14 (1.32) + Change in inflation (in 1 year) -1.08 (1.52) + Economic growth -0.72(0.65) ===== Adjusted R2 = -0.105</p>                                                                                                                                                                                                                                                                                                                                                                                                                                                                                                                                                                                                                       |
| 43 | <p>Tests of Existing Explanations of Anti-Immigrant Party Support: Dependent variable is electoral success = Lack of support for democracy 0.06* + Number of asylum applications 5.04 (15.14) + Relative unemployment -0.68 (0.58) + Relative inflation (0.93)0.32* + Relative economic growth -1.53 (1.17) ===== Adjusted R2 = 0.028</p>                                                                                                                                                                                                                                                                                                                                                                                                                                                                                                                                                                                                                         |
| 43 | <p>Tests of Existing Explanations of Anti-Immigrant Party Support: electoral potential ( Standard Coefficients) = Relative inflation -1.33 (0.39)** + Relative economic growth -2.88 (1.06)** =====Adjusted R2 = 0.081</p>                                                                                                                                                                                                                                                                                                                                                                                                                                                                                                                                                                                                                                                                                                                                        |
| 43 | <p>Tests of the authors Explanation of the Electoral Potential of Anti-Immigrant Parties ( Unstandardized Regression; Standard Coefficients Error ;<math>\beta</math>) = The electoral potential= Extent to which a party is evaluated according to its policies (43.08 ) (6.51)*** + Percentage of radical right-wing voters in electorate ( 0.379) 0.201*=====Adjusted R2 = 0.631</p>                                                                                                                                                                                                                                                                                                                                                                                                                                                                                                                                                                           |
| 43 | <p>Explanation of the Electoral Success of Anti-Immigrant Parties : = Extent to which party is evaluated according to its policies 22.03 (7.24) ** + Percentage of radical right-wing voters in electorate -0.09 (0.28) ===== Adjusted R2 = 0.390</p>                                                                                                                                                                                                                                                                                                                                                                                                                                                                                                                                                                                                                                                                                                             |
| 43 | <p>Explanation of the Electoral Success of Anti-Immigrant Parties ( Unstandardized Regression; Standard Coefficients Error ;<math>\beta</math>) = Extent to which party is evaluated according to its policies 20.66 (2.91) *** + Percentage of radical right-wing voters in electorate 0.46 (0.17) ** + Left/right position of main competitor 4.72 (0.67) *** + Extent to which a party is evaluated according to its policies—left/right position of main competitor-9.39 (1.75) *** + Emphasis of main competitor on core issues of anti-immigrant party -0.03 (0.10) + Proportional representation -1.26 (0.45)* + Size of largest competitor -10.25 (0.19) =====Adjusted R2 = 0.852</p>                                                                                                                                                                                                                                                                     |

|    |                                                                                                                                                                                                                                                                                                                                                                                                                                                                                          |
|----|------------------------------------------------------------------------------------------------------------------------------------------------------------------------------------------------------------------------------------------------------------------------------------------------------------------------------------------------------------------------------------------------------------------------------------------------------------------------------------------|
| 43 | Explanation of the Electoral Success of Anti-Immigrant Parties = <b>Extent to which party is evaluated according to its policies 21.28 (2.51)***</b> + <b>Percentage of radical right-wing voters in electorate 0.50 (0.16)**</b> + <b>Left/right position of main competitor -4.99 (0.61)***</b> + <b>Extent to which a party is evaluated according to its policies—left/right position of main competitor -9.91 (1.71) ***</b> =====Adjusted R2 = 0.830                               |
| 44 | Public support for PVV = <b>Visibility (t -1) 0.02</b> + <b>Public support (t -1) 0.45**</b> + <b>Vision (t -1) -0.01</b>                                                                                                                                                                                                                                                                                                                                                                |
| 44 | Public support for PVV = <b>Visibility (t -1) 0.02</b> + <b>Public support (t -1) 0.46**</b> + <b>Self-confidence (t -1) 0.02</b>                                                                                                                                                                                                                                                                                                                                                        |
| 44 | Public support for PVV = <b>Visibility (t -1) 0.02</b> + <b>Public support (t -1) 0.45**</b> + <b>vision (t-1) -0.01</b> + <b>Self-confidence (t -1) 0.01</b>                                                                                                                                                                                                                                                                                                                            |
| 44 | Public support for PVV = <b>Visibility (t-1) 0.02</b> + <b>Public support (t -1) 0.45**</b> + <b>Vision (t-1) -0.01</b>                                                                                                                                                                                                                                                                                                                                                                  |
| 44 | Public support for PVV = <b>Visibility (t -1) 0.02</b> + <b>Public support (t -1) 0.46**</b> + <b>Self-confidence (t-1) 0.02</b>                                                                                                                                                                                                                                                                                                                                                         |
| 44 | Public support for PVV = <b>Visibility (t -1) 0.02</b> + <b>Public support (t -1) 0.45**</b> + <b>vision (t-1) -0.01</b> + <b>Self-confidence (t -1) 0.01</b>                                                                                                                                                                                                                                                                                                                            |
| 45 | Regression model PVV predicting polls = <b>Polls (t-1) -0.05</b> + <b>Polls(t-2) -0.10*</b> + <b>party visibility(t-1)0.04</b> + <b>party visibility(t-2) 0.22**</b> + <b>leader visibility(t-1)0.06**</b> + <b>leader visibility(t-2)0.10***</b> + <b>immigration(t-1)0.04</b> + <b>immigration(t-2) 0.06*</b> + <b>unemployment(t-1)-0.08</b> + <b>unemployment(t-2)-0.13</b> + <b>immigration news(t-1)0.04**</b> + <b>immigration news(t-2)0.04**</b> + <b>elections dummy 0.26*</b> |
| 45 | Regression model DVU predicting polls = <b>Polls (t-1) -0.02</b> + <b>party visibility(t-1) -0.07</b> + <b>leader visibility(t-1)0.38***</b> + <b>immigration(t-1) -0.15*</b> + <b>unemployment(t-1)-0.09*</b> + <b>elections dummy 0.75**</b>                                                                                                                                                                                                                                           |
| 45 | Vlaams Blok/Vlaams Belang PARTY MODEL = <b>polls (t-1) 0.59***</b> + <b>visibility party(t-1) 0.07**</b> + <b>unemployment(t-1) -0.07*</b> + <b>immigration(t-1) 0.03</b> + <b>immigration news (t-1) 0.04</b> + <b>elections dummy -0.10*</b>                                                                                                                                                                                                                                           |
| 45 | Vlaams Blok/Vlaams Belang LEDAER MODEL = <b>polls (t-1) 0.58***</b> + <b>visibility party(t-1) 0.01</b> + <b>unemployment(t-1) -0.03</b> + <b>immigration(t-1) 0.00</b> + <b>immigration news (t-1) 0.07</b> + <b>elections dummy 0.02</b>                                                                                                                                                                                                                                               |
| 45 | CD PARTY MODEL = <b>polls (t-1) -0.25**</b> + <b>visibility party(t-1) 0.03</b> + <b>immigration(t-1) 0.04*</b> + <b>unemployment(t-1) -0.40*</b> + <b>immigration news (t-1) 0.30**</b> + <b>elections dummy -0.03</b>                                                                                                                                                                                                                                                                  |
| 45 | CD LEADER MODEL = <b>polls (t-1) -0.28***</b> + <b>polls (t-2) -0.15*</b> + <b>visibility party(t-1) 0.00</b> + <b>visibility party(t-2) 0.02</b> + <b>immigration(t-1) 0.03</b> + <b>immigration(t-2) 0.01</b> + <b>unemployment(t-1) -0.61*</b> + <b>unemployment (t-2) 1.35**</b> + <b>immigration news (t-1) 0.29*</b> + <b>immigration news (t-2) 0.07</b> + <b>elections dummy -0.04</b>                                                                                           |
| 45 | PVV PARTY MODEL = <b>polls (t-1) -0.06*</b> + <b>polls (t-2) -0.09*</b> + <b>visibility party(t-1) 0.07**</b> + <b>visibility party(t-2) 0.11***</b> + <b>immigration(t-1) 0.04*</b> + <b>immigration(t-2) 0.05*</b> + <b>unemployment(t-1) -0.08</b> + <b>unemployment(t-2) -0.09</b> + <b>immigration news (t-1) 0.04*</b> + <b>immigration news (t-2) 0.04**</b> + <b>elections dummy 0.28*</b>                                                                                       |
| 45 | PVV LEADER MODEL = <b>polls (t-1) -0.06*</b> + <b>polls (t-2) -0.08*</b> + <b>visibility party(t-1) 0.08**</b> + <b>visibility party(t-2) 0.09**</b> + <b>immigration(t-1) -0.05</b> + <b>immigration(t-2) -0.10</b> + <b>unemployment(t-1) 0.04*</b> + <b>unemployment (t-2) 0.04**</b> + <b>immigration news (t-1) 0.04*</b> + <b>immigration news (t-2) 0.06*</b> + <b>elections dummy 0.30*</b>                                                                                      |

|    |                                                                                                                                                                                                                                                                                                                                                               |
|----|---------------------------------------------------------------------------------------------------------------------------------------------------------------------------------------------------------------------------------------------------------------------------------------------------------------------------------------------------------------|
| 45 | Republikaner PARTY MODEL = polls (t-1) 0.22*** + polls (t-2) 0.23*** + visibility party(t-1) 0.21** + visibility party(t-2) -0.02 + immigration(t-1) -0.14* + immigration(t-2) 0.17** + unemployment(t-1) 0.32* + unemployment(t-2) -0.20* + elections dummy 0.02                                                                                             |
| 45 | Republikaner LEADER MODEL = polls (t-1) 0.22*** + polls (t-2) 0.24*** + visibility party(t-1) 0.13** + visibility party(t-2) -0.03 + immigration(t-1) -0.11* + immigration(t-2) 0.16* + unemployment(t-1) 0.29* + unemployment(t-2) -0.19* + elections dummy 0.03                                                                                             |
| 45 | NPD PARTY MODEL = polls (t-1) 0.10* + polls (t-2) 0.10* + polls (t-3) -0.18* + visibility party(t-1) 0.26** + visibility party(t-2) -0.01 + visibility party(t-3) 0.13* + immigration(t-1) -0.43* + immigration(t-2) 0.10 + immigration(t-3) -0.50*** + unemployment(t-1) 0.14 + unemployment(t-2) -1.01** + unemployment(t-3) 0.87 ** + elections dummy 0.03 |
| 45 | NPD LEADER MODEL = polls (t-1) 0.13* + polls (t-2) 0.19* + polls (t-3) -0.09* + visibility party(t-1) 0.05 + visibility party(t-2) 0.08* + visibility party(t-3) 0.04 + immigration(t-1) -0.35** + immigration(t-2) 0.07 + immigration(t-3) -0.50** + unemployment(t-1) 0.04 + unemployment(t-2) -0.68* + unemployment(t-3) 0.64** + elections dummy 0.13     |
| 45 | DVU PARTY MODEL = polls (t-1) 0.02 + visibility party(t-1) 0.29*** + immigration(t-1) -0.23** + unemployment(t-1) -0.03* + elections dummy 0.72**                                                                                                                                                                                                             |
| 45 | DVU LEADER MODEL = polls (t-1) -0.02 + visibility party(t-1) 0.39*** + immigration(t-1) -0.16* + unemployment(t-1) -0.09* + elections dummy 0.75**                                                                                                                                                                                                            |
| 45 | CD party model (quarterly data) = polls (t-1) 0.06 + visibility (t-1) 0.00 + immigration (t-1) 0.00 + unemployment (t-1) 0.20* + immigration news (t-1) 0.07* + elections dummy -0.07*                                                                                                                                                                        |
| 45 | CD LEADER MODEL (quarterly data) = polls (t-1) 0.04 + visibility (t-1) 0.03* + immigration (t-1) 0.04 + unemployment (t-1) -0.01 + elections dummy -0.12*                                                                                                                                                                                                     |
| 45 | Republikaner PARTY MODEL (quarterly data) = polls (t-1) 0.18* + visibility (t-1) 0.09 + immigration (t-1) -0.25** + unemployment (t-1) 0.06 + elections dummy 0.31*                                                                                                                                                                                           |
| 45 | Republikaner LEADER MODEL (quarterly data) = polls (t-1) 0.19* + visibility (t-1) 0.08 + immigration (t-1) -0.24** + unemployment (t-1) 0.05 + elections dummy 0.33**                                                                                                                                                                                         |
| 45 | DVU PARTY MODEL (quarterly data) = polls (t-1) 0.25** + visibility (t-1) 0.59*** + immigration (t-1) -0.08 + unemployment (t-1) -0.05 + elections dummy -0.10                                                                                                                                                                                                 |
| 45 | DVU LEADER MODEL (quarterly data) = polls (t-1) 0.31** + visibility (t-1) 0.71*** + immigration (t-1) 0.08 + unemployment (t-1) -0.07 + elections dummy -0.03                                                                                                                                                                                                 |
| 46 | Vlaams Blok scores (INRA voting intentions) = Immigration coverage De Standaard: 4–6 months before poll (0.355844) ( prob. 0.000) + Immigration coverage De Standaard: 7–9 months before poll (0.213828) (prob. 0.084) + Immigration coverage De Standaard: 10–12 months before poll (0.408269)(prob. 0.000) ===== Adjusted R2 = 0.563467                     |
| 46 | Vlaams Blok scores (INRA voting intentions) = Theft coverage Het Laatste Nieuws: 7–9 months before poll (0.308269)( prob.0.001) + Theft coverage Het Laatste Nieuws: 10–12 months before poll 0.392510 ( prob.0.000)===== Adjusted R2 =0.471323                                                                                                               |

|    |                                                                                                                                                                                                                                                                                                                                                                                                                     |
|----|---------------------------------------------------------------------------------------------------------------------------------------------------------------------------------------------------------------------------------------------------------------------------------------------------------------------------------------------------------------------------------------------------------------------|
| 46 | Vlaams Blok scores (INRA voting intentions) = <b>Immigration coverage De Standaard: 4–6 months before poll (0.418114)(prob. 0.000)</b> + <b>Immigration coverage De Standaard: 7–9 months before poll (0.233539)( prob.0.036)</b> + <b>Theft coverage TV: 7–9 months before poll 0.595124 (prob. 0.009)</b> + <b>Theft coverage TV: 10–12 months before poll 0.881959 ( prob.0.000)</b> ===== Adjusted R2 =0.670189 |
| 47 | Electoral support for parties (%) for True Finns = <b>Density of population -0.03</b> + <b>Share of immigrants 0.17</b> + <b>Share of Industrial &amp; construction workforce 0.11***</b> + <b>Unemployment rate in April 2011 -0.18*</b> + <b>Share of Finnish-Swedes -0.24***</b> + <b>'No' for EU in 1994 0.06</b>                                                                                               |
| 47 | Electoral support for parties (%) for True Finns = <b>Share of Industrial &amp; construction workforce 0.10***</b> + <b>Unemployment rate in April 2011 -0.18*</b> + <b>Share of Finnish-Swedes -0.24***</b> + <b>'No' for EU in 1994 0.08**</b>                                                                                                                                                                    |
| 47 | Electoral support for parties (%) for True Finns = <b>Share of immigrants -0.22</b> + <b>Share of Industrial &amp; construction workforce 0.08***</b> + <b>Unemployment rate in April 2011 -0.16</b> + <b>Share of Finnish-Swedes -0.23***</b>                                                                                                                                                                      |
| 47 | Electoral support for parties (%) for True Finns = <b>Density of population -0.05**</b> + <b>Share of Industrial &amp; construction workforce 0.11***</b> + <b>Unemployment rate in April 2011 -0.18*</b> + <b>Share of Finnish-Swedes -0.24***</b>                                                                                                                                                                 |
| 48 | Conservative: UKIP ratio = <b>Factor Professionals 0.26***(0.01)</b> + <b>Factor Economically deprived 0.12***(0.01)</b> + <b>Owner-occupiers 0.09***(0.02)</b> + <b>Rural and older -0.02 (0.01)</b> + <b>Number of other hard Eurosceptic parties 0.06***(0.02)</b>                                                                                                                                               |
| 48 | Labour UKIP ratio = <b>Factor Professionals - 0.08*** (0.02)</b> + <b>Factor Economically deprived 0.40*** (0.02)</b> + <b>Owner-occupiers -0.45*** (0.03)</b> + <b>Rural and older -0.38*** (0.02)</b> + <b>Number of other hard Eurosceptic parties -0.16*** (0.05)</b>                                                                                                                                           |
| 48 | BNP UKIP ratio = <b>Factor Professionals -0.22*** (0.02)</b> + <b>Factor Economically deprived 0.14*** (0.02)</b> + <b>Owner-occupiers -0.14*** (0.03)</b> + <b>Rural and older -0.28*** (0.02)</b> + <b>Number of other hard Eurosceptic parties -0.03 (0.04)</b>                                                                                                                                                  |

- Blue means that the beta coefficient in the regression analysis is positive and significant.
- Red means that the beta coefficient in the regression analysis is negative and significant.
- Green means that the beta coefficient is not significant.
- No color means that the beta coefficient represents an interaction term (in our counting of success, failure and no link, we do not include interaction terms).
